# Supplementary material for: Effects of isosteric substitutions on the conformational preference and cis–trans isomerization of proline-containing peptides
Source: Royal Society of Chemistry journal article supplement (doi:10.1039/c7nj01403a), 2017-01-01
Supplement: c7nj01403a1.pdf [file c7nj01403a1.pdf]

*New J. Chem.*

Supplementary information

## Effects of isosteric substitutions on the conformational preference and *cis-trans* isomerization of proline-containing peptides

Hae Sook Park and Young Kee Kang\*

*Department of Chemistry and BK21 PLUS Research Team, Chungbuk National University, Cheongju, Chungbuk 28644, Republic of Korea.*

*E-mail: ykkang@chungbuk.ac.kr*

| Page  | Contents                                                                                                                                          |
|-------|---------------------------------------------------------------------------------------------------------------------------------------------------|
| s1–s2 | Table of contents                                                                                                                                 |
| s3    | <b>Table S1</b> Torsion angles and thermodynamic properties of local minima and transition states of Ac-Pro- $\psi$ [CS–NH]Me in water            |
| s3    | <b>Fig. S1</b> The representative structures of Ac-Pro- $\psi$ [CS–NH]Me optimized in water.                                                      |
| s4    | <b>Table S2</b> Torsion angles and thermodynamic properties of local minima and transition states of Ac-Pro- $\psi$ [CSe–NH]Me in water           |
| s4    | <b>Fig. S2</b> The representative structures of Ac-Pro- $\psi$ [CSe–NH]Me optimized in water.                                                     |
| s5    | <b>Table S3</b> Absolute values of electronic energies, enthalpies, Gibbs free energies, and single-point energies of Ac-Pro-NHMe                 |
| s5    | <b>Table S4</b> Absolute values of electronic energies, enthalpies, Gibbs free energies, and single-point energies of Ac- $\psi$ (CS–NH)Pro-NHMe  |
| s6    | <b>Table S5</b> Absolute values of electronic energies, enthalpies, Gibbs free energies, and single-point energies of Ac- $\psi$ (CSe–NH)Pro-NHMe |
| s6    | <b>Table S6</b> Absolute values of electronic energies, enthalpies, Gibbs free energies, and single-point energies of Ac-Pro- $\psi$ (CS–NH)Me    |
| s7    | <b>Table S7</b> Absolute values of electronic energies, enthalpies, Gibbs free energies, and single-point energies of Ac-Pro- $\psi$ (CSe–NH)Me   |
| s8    | <b>Table S8</b> Absolute values of electronic energies, enthalpies, Gibbs free energies, and single-point energies of Ac-Ala-Pro-NHMe             |

- s9 **Table S9** Absolute values of electronic energies, enthalpies, Gibbs free energies, and single-point energies of Ac-Ala- $\psi$ (CS–NH)Pro-NHMe
- s9 **Table S10** Absolute values of electronic energies, enthalpies, Gibbs free energies, and single-point energies of Ac-Ala- $\psi$ (CSe–NH)Pro-NHMe
- s10–s23 Optimized Cartesian coordinates of representative structures of Ac- $\psi$ (CX–NH)Pro-NHMe, Ac-Pro- $\psi$ (CX–NH)Me, and Ac-Ala- $\psi$ (CX–NH)Pro-NHMe (**X** = O, S, and Se) at the SMD M06-2X/6-31+G(d) level of theory in water

**Table S1** Torsion angles ( $^{\circ}$ ) and thermodynamic properties (kcal/mol) of local minima and transition states of Ac-Pro- $\psi$ [CS-NH]Me in water<sup>a</sup>

| Conf.                     | Torsion angles |          |          |            |            | Thermodynamic properties |                |              |              |
|---------------------------|----------------|----------|----------|------------|------------|--------------------------|----------------|--------------|--------------|
|                           | $\omega_0$     | $\phi_1$ | $\psi_1$ | $\omega_1$ | $\chi_1^1$ | $\Delta E_{e,0}^b$       | $\Delta E_e^c$ | $\Delta H^d$ | $\Delta G^e$ |
| cAd                       | 1.7            | -81.7    | -14.9    | -179.3     | 33.4       | 2.92                     | 0.34           | 0.00         | 0.00         |
| cFd                       | -5.6           | -68.2    | 150.0    | 175.7      | 31.0       | 6.31                     | 0.37           | 0.19         | 0.12         |
| tFu                       | 176.7          | -58.4    | 142.1    | 176.2      | -22.6      | 5.07                     | 0.00           | 0.06         | 0.37         |
| tAu                       | -177.2         | -65.4    | -26.5    | -177.9     | -24.0      | 6.06                     | 0.23           | 0.27         | 0.81         |
| cFu                       | -9.0           | -55.3    | 143.2    | 176.9      | -22.8      | 7.04                     | 0.73           | 0.63         | 0.87         |
| cAu                       | -2.6           | -66.1    | -26.9    | -176.5     | -22.0      | 3.94                     | 1.46           | 1.44         | 1.90         |
| tCd                       | -170.2         | -87.1    | 62.0     | 179.4      | 34.2       | 0.00                     | 1.99           | 1.95         | 2.74         |
| ts1                       | 119.0          | -100.6   | -14.6    | -178.9     | 14.8       | 18.88                    | 20.30          | 19.25        | 20.75        |
| ts2                       | 119.7          | -106.0   | -9.2     | -178.6     | -31.7      | 19.37                    | 20.52          | 19.20        | 20.28        |
| ts3                       | -59.9          | -107.0   | -1.1     | 179.4      | 22.6       | 19.70                    | 20.19          | 18.87        | 20.10        |
| ts4                       | -61.6          | -92.2    | -7.4     | 179.6      | -37.8      | 19.99                    | 19.94          | 18.66        | 19.60        |
| <i>cis</i> % <sup>f</sup> |                |          |          |            |            |                          |                |              | 72.3         |

<sup>a</sup> Torsion angles are defined in Fig. 1. Calculated at the DSD-PBEP86-D3BJ/def2-TZVP//SMD M06-2X/6-31+G(d) level of theory in water. <sup>b</sup> Relative single-point electronic energies at the DSD-PBEP86-D3BJ/def2-TZVP level of theory. <sup>c</sup> Relative electronic energies in water. <sup>d</sup> Relative enthalpies at 25  $^{\circ}$ C in water. <sup>e</sup> Relative Gibbs free energies at 25  $^{\circ}$ C in water. <sup>f</sup> Population (%) of *cis* conformers calculated by  $\Delta G$  values at 25  $^{\circ}$ C in water.

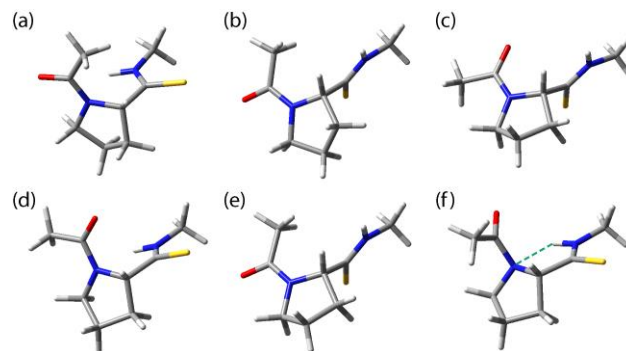

**Fig. S1** The representative structures of Ac-Pro- $\psi$ [CS-NH]Me optimized in water: local minima (a) cAd, (b) cFd, (c) tFu, (d) tAu, and (e) cFu ( $\Delta G = 0.00, 0.12, 0.37, 0.81,$  and  $0.87$  kcal/mol, respectively) and transition state (f) ts4 ( $\Delta G = 19.60$  kcal/mol). Intramolecular H-bond is represented by dotted lines.

**Table S2** Torsion angles ( $^{\circ}$ ) and thermodynamic properties (kcal/mol) of local minima and transition states of Ac-Pro- $\psi$ [CSe–NH]Me in water<sup>a</sup>

| Conf.                    | Torsion angles |          |          |            |            | Thermodynamic properties |                |              |              |
|--------------------------|----------------|----------|----------|------------|------------|--------------------------|----------------|--------------|--------------|
|                          | $\omega_0$     | $\phi_1$ | $\psi_1$ | $\omega_1$ | $\chi_1^1$ | $\Delta E_{e,0}^b$       | $\Delta E_e^c$ | $\Delta H^d$ | $\Delta G^e$ |
| tFu                      | 167.5          | -50.7    | 145.2    | 174.5      | -19.3      | 5.46                     | 0.32           | 0.11         | 0.00         |
| cAd                      | 0.3            | -81.1    | -14.6    | -178.6     | 34.0       | 2.84                     | 0.49           | 0.28         | 0.16         |
| tAd                      | -176.9         | -74.7    | -15.7    | -178.1     | 31.8       | 5.19                     | 0.00           | 0.00         | 0.24         |
| tAu                      | -175.9         | -69.1    | -21.6    | -175.1     | -23.4      | 5.66                     | 0.51           | 0.32         | 0.25         |
| tFd                      | 170.0          | -60.5    | 151.9    | 175.5      | 30.9       | 4.85                     | 0.39           | 0.40         | 0.62         |
| cFd                      | -10.9          | -67.0    | 159.6    | 177.1      | 34.1       | 6.72                     | 0.72           | 0.80         | 1.41         |
| cFu                      | -18.4          | -49.7    | 145.4    | 175.8      | -18.4      | 7.75                     | 1.17           | 1.10         | 1.74         |
| cAu                      | -1.0           | -73.4    | -20.9    | -177.1     | -19.4      | 3.73                     | 1.63           | 1.64         | 1.92         |
| tCd                      | -171.2         | -86.7    | 65.9     | 178.1      | 33.9       | 0.00                     | 2.63           | 2.45         | 2.74         |
| ts1                      | 119.0          | -102.8   | -14.4    | -178.0     | 17.0       | 18.69                    | 20.15          | 18.76        | 19.75        |
| ts2                      | 121.6          | -107.1   | -13.4    | -176.4     | -31.0      | 19.13                    | 20.61          | 19.19        | 19.85        |
| ts3                      | -59.1          | -102.4   | -10.7    | -179.0     | 18.5       | 19.60                    | 20.10          | 18.83        | 19.40        |
| ts4                      | -61.2          | -93.0    | -13.8    | -176.1     | -37.4      | 19.77                    | 19.96          | 18.79        | 19.59        |
| <i>cis%</i> <sup>f</sup> |                |          |          |            |            |                          |                |              | 26.1         |

<sup>a</sup> Torsion angles are defined in Fig. 1. Calculated at the DSD-PBEP86-D3BJ/def2-TZVP//SMD M06-2X/6-31+G(d) level of theory in water. <sup>b</sup> Relative single-point electronic energies at the DSD-PBEP86-D3BJ/def2-TZVP level of theory. <sup>c</sup> Relative electronic energies in water. <sup>d</sup> Relative enthalpies at 25 °C in water. <sup>e</sup> Relative Gibbs free energies at 25 °C in water. <sup>f</sup> Population (%) of *cis* conformers calculated by  $\Delta G$  values at 25 °C in water.

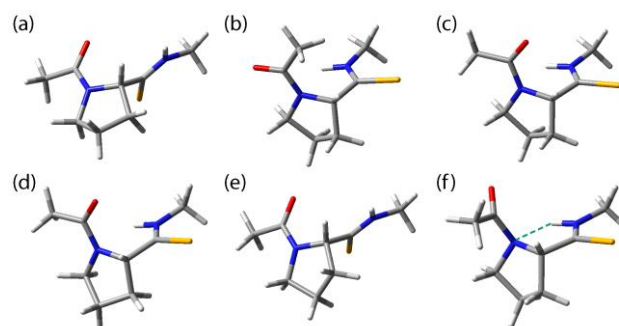**Fig. S2** The representative structures of Ac-Pro- $\psi$ [CSe–NH]Me optimized in water: local minima (a) tFu, (b) cAd, (c) tAd, (d) tAu, and (e) tFd ( $\Delta G = 0.00, 0.16, 0.24, 0.25,$  and  $0.62$  kcal/mol, respectively) and transition state (f) ts3 ( $\Delta G = 19.40$  kcal/mol). Intramolecular H-bond is represented by dotted lines.

**Table S3** Absolute values of electronic energies, enthalpies, and Gibbs free energies in water at the SMD M06-2X/6-31+G(d) level of theory and single-point energies at the M06-2X/6-31+G(d) and DSD-PBEP86-D3BJ/def2-TZVP levels of theory for Ac-Pro-NHMe<sup>a</sup>

| Conf. | SMD M06-2X/6-31+G(d) |             |             | M06-2X/6-31+G(d) | DSD-PBEP86-D3BJ/<br>def2-TZVP |
|-------|----------------------|-------------|-------------|------------------|-------------------------------|
|       | $E_e^b$              | $H^b$       | $G^b$       | $E_e^c$          | $E_e^c$                       |
| tFu   | -573.0641152         | -572.837180 | -572.890820 | -573.030324      | -573.233531                   |
| tFd   | -573.0639107         | -572.836788 | -572.890516 | -573.031881      | -573.235250                   |
| cFd   | -573.0625970         | -572.835580 | -572.891269 | -573.029407      | -573.232895                   |
| tAd   | -573.0635739         | -572.836656 | -572.890320 | -573.031830      | -573.234649                   |
| cBd   | -573.0629790         | -572.836248 | -572.890468 | -573.034751      | -573.237235                   |
| cFu   | -573.0624482         | -572.835264 | -572.888665 | -573.028649      | -573.231991                   |
| tAu   | -573.0626140         | -572.835468 | -572.888155 | -573.030105      | -573.232797                   |
| tCd   | -573.0616941         | -572.834923 | -572.888283 | -573.039985      | -573.243387                   |
| cAu   | -573.0607179         | -572.833679 | -572.886549 | -573.032687      | -573.235185                   |
| tCu   | -573.0586672         | -572.831598 | -572.884875 | -573.037098      | -573.240184                   |
| ts1   | -573.0304925         | -572.805506 | -572.857959 | -573.008322      | -573.211005                   |
| ts2   | -573.0302529         | -572.805356 | -572.857497 | -573.007155      | -573.209840                   |
| ts3   | -573.0311591         | -572.805944 | -572.858393 | -573.006836      | -573.209224                   |
| ts4   | -573.0313552         | -572.806067 | -572.858204 | -573.006009      | -573.208475                   |

<sup>a</sup> All energies are in hartrees. The optimized structures were taken from ref. 71, except for cFd. <sup>b</sup>  $E_e$  is the electronic energy.  $H$  and  $G$  are the enthalpy and Gibbs free energy, respectively, calculated at 25°C and 1 atm. <sup>c</sup> Single-point energy for the conformer optimized at the SMD M06-2X/6-31+G(d) level of theory in water.

**Table S4** Absolute values of electronic energies, enthalpies, and Gibbs free energies in water at the SMD M06-2X/6-31+G(d) level of theory and single-point energies at the M06-2X/6-31+G(d) and DSD-PBEP86-D3BJ/def2-TZVP levels of theory for Ac- $\psi$ (CS-NH)Pro-NHMe<sup>a</sup>

| Conf. | SMD M06-2X/6-31+G(d) |             |             | M06-2X/6-31+G(d) | DSD-PBEP86-D3BJ/<br>def2-TZVP |
|-------|----------------------|-------------|-------------|------------------|-------------------------------|
|       | $E_e^b$              | $H^b$       | $G^b$       | $E_e^c$          | $E_e^c$                       |
| tFu   | -896.0056777         | -895.780450 | -895.834627 | -895.975566      | -895.177650                   |
| tAd   | -896.0055842         | -895.780315 | -895.835314 | -895.975452      | -895.176958                   |
| tFd   | -896.0062273         | -895.780788 | -895.834262 | -895.977623      | -895.179487                   |
| cFd   | -896.0046816         | -895.779350 | -895.834057 | -895.974005      | -895.175821                   |
| cFu   | -896.0041072         | -895.778924 | -895.833673 | -895.972955      | -895.174503                   |
| tAu   | -896.0044369         | -895.779228 | -895.833305 | -895.974226      | -895.175807                   |
| cBd   | -896.0047893         | -895.779436 | -895.834366 | -895.980302      | -895.181153                   |
| tCd   | -896.0017306         | -895.776481 | -895.830570 | -895.982019      | -895.184301                   |
| cAu   | -896.0022075         | -895.776851 | -895.830897 | -895.977535      | -895.178459                   |
| ts1   | -895.9651167         | -895.742119 | -895.794503 | -895.946233      | -895.148551                   |
| ts2   | -895.9636663         | -895.740846 | -895.794397 | -895.944276      | -895.146716                   |
| ts4   | -895.9645298         | -895.741261 | -895.794411 | -895.943089      | -895.144981                   |
| ts3   | -895.9648529         | -895.741666 | -895.794496 | -895.944567      | -895.146296                   |

<sup>a</sup> All energies are in hartrees. <sup>b</sup>  $E_e$  is the electronic energy.  $H$  and  $G$  are the enthalpy and Gibbs free energy, respectively, calculated at 25°C and 1 atm. <sup>c</sup> Single-point energy for the conformer optimized at the SMD M06-2X/6-31+G(d) level of theory in water.

**Table S5** Absolute values of electronic energies, enthalpies, and Gibbs free energies in water at the SMD M06-2X/6-31+G(d) level of theory and single-point energies at the M06-2X/6-31+G(d) and DSD-PBEP86-D3BJ/def2-TZVP levels of theory for Ac- $\psi$ (CSe-NH)Pro-NHMe<sup>a</sup>

| Conf. | SMD M06-2X/6-31+G(d) |              |              | M06-2X/6-31+G(d) | DSD-PBEP86-D3BJ/<br>def2-TZVP |
|-------|----------------------|--------------|--------------|------------------|-------------------------------|
|       | $E_e^b$              | $H^b$        | $G^b$        | $E_e^c$          | $E_e^c$                       |
| tFu   | -2897.3089609        | -2897.083891 | -2897.139721 | -2897.276042     | -2897.974490                  |
| tFd   | -2897.3093787        | -2897.083869 | -2897.138804 | -2897.277850     | -2897.976324                  |
| tAd   | -2897.3088289        | -2897.083758 | -2897.139536 | -2897.276696     | -2897.974592                  |
| cFd   | -2897.3069233        | -2897.081449 | -2897.136506 | -2897.274022     | -2897.973479                  |
| tAu   | -2897.3076621        | -2897.082735 | -2897.137281 | -2897.275728     | -2897.973324                  |
| cFu   | -2897.3055503        | -2897.080107 | -2897.135412 | -2897.272296     | -2897.972015                  |
| cBd   | -2897.3073908        | -2897.082217 | -2897.136930 | -2897.281108     | -2897.978896                  |
| cAu   | -2897.3038786        | -2897.078979 | -2897.135249 | -2897.276842     | -2897.975490                  |
| tCd   | -2897.3051210        | -2897.079730 | -2897.133791 | -2897.284103     | -2897.981607                  |
| tCu   | -2897.3006033        | -2897.075142 | -2897.130176 | -2897.279750     | -2897.979274                  |
| ts1   | -2897.2632582        | -2897.040506 | -2897.094419 | -2897.244650     | -2897.943825                  |
| ts2   | -2897.2624677        | -2897.039976 | -2897.093979 | -2897.243665     | -2897.942303                  |
| ts3   | -2897.2616147        | -2897.038977 | -2897.093402 | -2897.241835     | -2897.941758                  |
| ts4   | -2897.2611585        | -2897.038345 | -2897.092500 | -2897.240304     | -2897.940021                  |

<sup>a</sup> All energies are in hartrees. <sup>b</sup>  $E_e$  is the electronic energy.  $H$  and  $G$  are the enthalpy and Gibbs free energy, respectively, calculated at 25°C and 1 atm. <sup>c</sup> Single-point energy for the conformer optimized at the SMD M06-2X/6-31+G(d) level of theory in water.

**Table S6** Absolute values of electronic energies, enthalpies, and Gibbs free energies in water at the SMD M06-2X/6-31+G(d) level of theory and single-point energies at the M06-2X/6-31+G(d) and DSD-PBEP86-D3BJ/def2-TZVP levels of theory for Ac-Pro- $\psi$ (CS-NH)Me<sup>a</sup>

| Conf. | SMD M06-2X/6-31+G(d) |             |             | M06-2X/6-31+G(d) | DSD-PBEP86-D3BJ/<br>def2-TZVP |
|-------|----------------------|-------------|-------------|------------------|-------------------------------|
|       | $E_e^b$              | $H^b$       | $G^b$       | $E_e^c$          | $E_e^c$                       |
| cAd   | -896.0061133         | -895.781196 | -895.836113 | -895.981566      | -895.182187                   |
| cFd   | -896.0050529         | -895.779877 | -895.834930 | -895.975143      | -895.176785                   |
| tFu   | -896.0056411         | -895.780090 | -895.834350 | -895.977119      | -895.178757                   |
| tAu   | -896.0060342         | -895.780508 | -895.834072 | -895.976303      | -895.177181                   |
| cFu   | -896.0044533         | -895.779159 | -895.833660 | -895.973972      | -895.175632                   |
| cAu   | -896.0045781         | -895.779146 | -895.832852 | -895.980180      | -895.180557                   |
| tCd   | -896.0025967         | -895.777191 | -895.830256 | -895.985328      | -895.186844                   |
| ts1   | -895.9738109         | -895.750026 | -895.802026 | -895.955636      | -895.156756                   |
| ts2   | -895.9737624         | -895.750413 | -895.803071 | -895.955155      | -895.155969                   |
| ts3   | -895.9741296         | -895.750771 | -895.803214 | -895.954476      | -895.155444                   |
| ts4   | -895.9747785         | -895.751357 | -895.804852 | -895.954268      | -895.154993                   |

<sup>a</sup> All energies are in hartrees. <sup>b</sup>  $E_e$  is the electronic energy.  $H$  and  $G$  are the enthalpy and Gibbs free energy, respectively, calculated at 25°C and 1 atm. <sup>c</sup> Single-point energy for the conformer optimized at the SMD M06-2X/6-31+G(d) level of theory in water.

**Table S7** Absolute values of electronic energies, enthalpies, and Gibbs free energies in water at the SMD M06-2X/6-31+G(d) level of theory and single-point energies at the M06-2X/6-31+G(d) and DSD-PBEP86-D3BJ/def2-TZVP levels of theory for Ac-Pro- $\psi$ (CSe-NH)Me<sup>a</sup>

| Conf. | SMD M06-2X/6-31+G(d) |              |              | M06-2X/6-31+G(d) | DSD-PBEP86-D3BJ/<br>def2-TZVP |
|-------|----------------------|--------------|--------------|------------------|-------------------------------|
|       | $E_e^b$              | $H^b$        | $G^b$        | $E_e^c$          | $E_e^c$                       |
| tFu   | -2897.3119251        | -2897.086772 | -2897.141471 | -2897.281279     | -2897.975449                  |
| cAd   | -2897.3103396        | -2897.085189 | -2897.140017 | -2897.284128     | -2897.979620                  |
| tAd   | -2897.3105778        | -2897.085092 | -2897.139290 | -2897.279848     | -2897.975877                  |
| tAu   | -2897.3088878        | -2897.083703 | -2897.138558 | -2897.278224     | -2897.975133                  |
| tFd   | -2897.3113299        | -2897.085830 | -2897.139991 | -2897.281756     | -2897.976416                  |
| cFd   | -2897.3109641        | -2897.085346 | -2897.138815 | -2897.278949     | -2897.973447                  |
| cFu   | -2897.3109455        | -2897.085578 | -2897.138741 | -2897.278001     | -2897.971794                  |
| cAu   | -2897.3073360        | -2897.081835 | -2897.135941 | -2897.281531     | -2897.978211                  |
| tCd   | -2897.3041449        | -2897.078953 | -2897.132576 | -2897.285880     | -2897.984149                  |
| ts1   | -2897.2776070        | -2897.054323 | -2897.107173 | -2897.257465     | -2897.954360                  |
| ts2   | -2897.2763869        | -2897.053174 | -2897.106840 | -2897.256291     | -2897.953664                  |
| ts3   | -2897.2775986        | -2897.054129 | -2897.108315 | -2897.255937     | -2897.952915                  |
| ts4   | -2897.2775740        | -2897.053958 | -2897.106999 | -2897.255423     | -2897.952648                  |

<sup>a</sup> All energies are in hartrees. <sup>b</sup>  $E_e$  is the electronic energy.  $H$  and  $G$  are the enthalpy and Gibbs free energy, respectively, calculated at 25°C and 1 atm. <sup>c</sup> Single-point energy for the conformer optimized at the SMD M06-2X/6-31+G(d) level of theory in water.

**Table S8** Absolute values of electronic energies, enthalpies, and Gibbs free energies in water at the SMD M06-2X/6-31+G(d) level of theory and single-point energies at the M06-2X/6-31+G(d) and DSD-PBEP86-D3BJ/def2-TZVP levels of theory for Ac-Ala-Pro-NHMe<sup>a</sup>

| Conf. | SMD M06-2X/6-31+G(d) |             |             | M06-2X/6-31+G(d) | DSD-PBEP86-D3BJ/<br>def2-TZVP |
|-------|----------------------|-------------|-------------|------------------|-------------------------------|
|       | $E_e^b$              | $H^b$       | $G^b$       | $E_e^c$          | $E_e^c$                       |
| FtFu  | -820.3108405         | -819.997454 | -820.065209 | -820.262546      | -819.428058                   |
| EtFu  | -820.3091907         | -819.996041 | -820.064636 | -820.267147      | -819.432420                   |
| AtFu  | -820.3091130         | -819.995777 | -820.063537 | -820.251397      | -819.417326                   |
| EtAu  | -820.3081270         | -819.995392 | -820.064632 | -820.266114      | -819.430869                   |
| FcBd  | -820.3118790         | -819.998867 | -820.064741 | -820.274672      | -819.439253                   |
| EcBd  | -820.3077537         | -819.994882 | -820.063342 | -820.268861      | -819.434028                   |
| FtAu  | -820.3092387         | -819.995759 | -820.063165 | -820.259389      | -819.424717                   |
| EcFd  | -820.3075667         | -819.994386 | -820.062432 | -820.265837      | -819.431792                   |
| FtCd  | -820.3084432         | -819.995354 | -820.063048 | -820.271136      | -819.436253                   |
| AtAu  | -820.3113315         | -819.997958 | -820.063222 | -820.266862      | -819.430832                   |
| EcFd  | -820.3074395         | -819.993941 | -820.061153 | -820.266445      | -819.432382                   |
| AtBd  | -820.3093095         | -819.996376 | -820.062715 | -820.266863      | -819.430959                   |
| EcFu  | -820.3072839         | -819.993746 | -820.060811 | -820.265611      | -819.431539                   |
| EcAu  | -820.3056915         | -819.992680 | -820.060642 | -820.266211      | -819.431848                   |
| FcBu  | -820.3090049         | -819.995684 | -820.061328 | -820.271285      | -819.436001                   |
| EtCd  | -820.3063176         | -819.993137 | -820.060336 | -820.274227      | -819.439073                   |
| DcAd  | -820.3083979         | -819.995426 | -820.061451 | -820.267714      | -819.431178                   |
| DcFd  | -820.3090598         | -819.995907 | -820.061195 | -820.270501      | -819.434142                   |
| DtCd  | -820.3043791         | -819.991398 | -820.059735 | -820.271313      | -819.436100                   |
| F*tFu | -820.3041378         | -819.991994 | -820.058525 | -820.250400      | -819.415936                   |
| A*cAd | -820.3094083         | -819.996188 | -820.060774 | -820.268227      | -819.431167                   |
| AtCd  | -820.3044854         | -819.991207 | -820.057868 | -820.265327      | -819.430281                   |
| ts    | -820.2780454         | -819.966996 | -820.033767 | -820.242002      | -819.406450                   |

<sup>a</sup> All energies are in hartrees. <sup>b</sup>  $E_e$  is the electronic energy.  $H$  and  $G$  are the enthalpy and Gibbs free energy, respectively, calculated at 25°C and 1 atm. <sup>c</sup> Single-point energy for the conformer optimized at the SMD M06-2X/6-31+G(d) level of theory in water.



**Table S9** Absolute values of electronic energies, enthalpies, and Gibbs free energies in water at the SMD M06-2X/6-31+G(d) level of theory and single-point energies at the M06-2X/6-31+G(d) and DSD-PBEP86-D3BJ/def2-TZVP levels of theory for Ac-Ala- $\psi$ (CS–NH)Pro-NHMe<sup>a</sup>

| Conf. | SMD M06-2X/6-31+G(d) |              |              | M06-2X/6-31+G(d) | DSD-PBEP86-D3BJ/<br>def2-TZVP |
|-------|----------------------|--------------|--------------|------------------|-------------------------------|
|       | $E_e^b$              | $H^b$        | $G^b$        | $E_e^c$          | $E_e^c$                       |
| FtAu  | -1143.2505637        | -1142.939329 | -1143.012923 | -1143.206321     | -1142.162930                  |
| FtFu  | -1143.2516287        | -1142.941518 | -1143.008789 | -1143.210193     | -1142.167098                  |
| FcBd  | -1143.2526792        | -1142.941427 | -1143.009161 | -1143.221601     | -1142.177316                  |
| EcBd  | -1143.2497381        | -1142.938712 | -1143.007600 | -1143.213937     | -1142.170933                  |
| AtFu  | -1143.2499549        | -1142.938318 | -1143.007281 | -1143.196329     | -1142.153607                  |
| EtFu  | -1143.2504679        | -1142.939080 | -1143.007007 | -1143.211379     | -1142.168653                  |
| EcFu  | -1143.2495700        | -1142.938308 | -1143.006806 | -1143.210181     | -1142.167636                  |
| EcFd  | -1143.2496735        | -1142.938198 | -1143.006554 | -1143.210642     | -1142.168262                  |
| FtAd  | -1143.2529575        | -1142.942328 | -1143.007770 | -1143.209320     | -1142.165639                  |
| EtAu  | -1143.2497954        | -1142.938608 | -1143.007138 | -1143.209612     | -1142.166350                  |
| AtAu  | -1143.2526451        | -1142.941217 | -1143.007758 | -1143.210505     | -1142.165970                  |
| ts    | -1143.2131760        | -1142.904222 | -1142.971718 | -1143.180782     | -1142.137526                  |

<sup>a</sup> All energies are in hartrees. <sup>b</sup>  $E_e$  is the electronic energy.  $H$  and  $G$  are the enthalpy and Gibbs free energy, respectively, calculated at 25°C and 1 atm. <sup>c</sup> Single-point energy for the conformer optimized at the SMD M06-2X/6-31+G(d) level of theory in water.

**Table S10** Absolute values of electronic energies, enthalpies, and Gibbs free energies in water at the SMD M06-2X/6-31+G(d) level of theory and single-point energies at the M06-2X/6-31+G(d) and DSD-PBEP86-D3BJ/def2-TZVP levels of theory for Ac-Ala- $\psi$ (CSe–NH)Pro-NHMe<sup>a</sup>

| Conf. | SMD M06-2X/6-31+G(d) |              |              | M06-2X/6-31+G(d) | DSD-PBEP86-D3BJ/<br>def2-TZVP |
|-------|----------------------|--------------|--------------|------------------|-------------------------------|
|       | $E_e^b$              | $H^b$        | $G^b$        | $E_e^c$          | $E_e^c$                       |
| FtAu  | -3144.5612650        | -3144.250364 | -3144.320216 | -3144.515346     | -3144.960689                  |
| FtFu  | -3144.5622641        | -3144.251067 | -3144.319384 | -3144.518697     | -3144.964590                  |
| FcBd  | -3144.5616475        | -3144.250526 | -3144.318533 | -3144.529073     | -3144.975231                  |
| EcBd  | -3144.5572625        | -3144.246217 | -3144.316722 | -3144.520991     | -3144.968625                  |
| EcFu  | -3144.5549033        | -3144.245109 | -3144.313135 | -3144.513544     | -3144.964333                  |
| EtAd  | -3144.5592486        | -3144.248009 | -3144.316645 | -3144.518286     | -3144.965388                  |
| AtAu  | -3144.5619757        | -3144.250867 | -3144.318800 | -3144.516917     | -3144.961685                  |
| EcFd  | -3144.5555425        | -3144.245007 | -3144.312490 | -3144.515585     | -3144.966123                  |
| EtAu  | -3144.5576176        | -3144.246608 | -3144.315598 | -3144.516352     | -3144.963547                  |
| FtCd  | -3144.5585870        | -3144.247346 | -3144.315774 | -3144.525430     | -3144.970762                  |
| AtBd  | -3144.5587995        | -3144.248464 | -3144.314779 | -3144.516337     | -3144.962076                  |
| FcAu  | -3144.5572612        | -3144.245703 | -3144.313147 | -3144.522534     | -3144.968774                  |
| DcAd  | -3144.5544125        | -3144.243437 | -3144.311036 | -3144.516819     | -3144.964236                  |
| DcFd  | -3144.5557282        | -3144.244157 | -3144.310124 | -3144.519221     | -3144.967147                  |
| ts    | -3144.5190244        | -3144.210265 | -3144.277375 | -3144.487471     | -3144.933618                  |

<sup>a</sup> All energies are in hartrees. <sup>b</sup>  $E_e$  is the electronic energy.  $H$  and  $G$  are the enthalpy and Gibbs free energy, respectively, calculated at 25°C and 1 atm. <sup>c</sup> Single-point energy for the conformer optimized at the SMD M06-2X/6-31+G(d) level of theory in water.

Optimized Cartesian coordinates of representative structures of Ac- $\psi$ (CX–NH)Pro–NHMe, Ac–Pro- $\psi$ (CX–NH)Me, and Ac–Ala- $\psi$ (CX–NH)Pro–NHMe (X = O, S, and Se) at the SMD M06-2X/6-31+G(d) level of theory in water (Shown in Fig. 2–7, and Fig. S1 and S2):

**Ac-Pro-NHMe**

|         |           |           |           |         |           |           |           |
|---------|-----------|-----------|-----------|---------|-----------|-----------|-----------|
|         |           |           |           | H       | 1.001747  | 2.522574  | -0.540253 |
|         |           |           |           | H       | -0.384772 | 2.403082  | -1.640604 |
| (a) tFu |           |           |           | H       | -0.448297 | 2.194008  | 1.415083  |
|         |           |           |           | H       | -1.439026 | 3.253599  | 0.392978  |
| N       | -1.111575 | -0.043507 | -0.123617 | H       | 2.510025  | -0.147296 | -1.461066 |
| C       | 0.107939  | 0.665812  | -0.506317 | H       | 3.839775  | 0.08118   | 1.081653  |
| C       | -2.17178  | 0.862507  | 0.345008  | H       | 3.45693   | -1.626171 | 0.765085  |
| C       | -0.177167 | 2.113335  | -0.068877 | H       | 4.458755  | -0.711681 | -0.385041 |
| C       | 1.333803  | 0.107369  | 0.205471  |         |           |           |           |
| O       | 1.298569  | -0.224939 | 1.400957  | (c) cFd |           |           |           |
| C       | -1.7002   | 2.2184    | -0.175158 | N       | -1.203306 | 0.045792  | -0.213066 |
| C       | -1.191941 | -1.380266 | -0.217162 | C       | 0.095502  | 0.419511  | -0.765648 |
| O       | -0.23803  | -2.04739  | -0.666167 | C       | -1.927662 | 1.18664   | 0.369653  |
| C       | -2.476009 | -2.026271 | 0.229055  | C       | -0.001195 | 1.956008  | -0.84711  |
| N       | 2.457781  | 0.070286  | -0.51636  | C       | 1.240857  | -0.006439 | 0.154096  |
| C       | 3.719016  | -0.365296 | 0.060031  | O       | 1.088648  | -0.122575 | 1.380174  |
| H       | -2.346834 | -3.108874 | 0.230593  | C       | -0.903472 | 2.320142  | 0.335333  |
| H       | -3.287704 | -1.76288  | -0.457699 | C       | -1.645683 | -1.215256 | -0.061489 |
| H       | -2.760915 | -1.687287 | 1.229704  | O       | -2.736991 | -1.445827 | 0.494663  |
| H       | 0.251871  | 0.601454  | -1.591472 | C       | -0.78156  | -2.3296   | -0.593139 |
| H       | -2.223799 | 0.848813  | 1.44029   | N       | 2.418095  | -0.21096  | -0.446078 |
| H       | -3.139721 | 0.561168  | -0.060436 | C       | 3.615477  | -0.524292 | 0.316633  |
| H       | 0.132427  | 2.244046  | 0.974458  | H       | -1.340318 | -3.264366 | -0.54025  |
| H       | 0.35999   | 2.833739  | -0.688692 | H       | 0.127667  | -2.426098 | 0.011084  |
| H       | -2.110419 | 3.047921  | 0.404716  | H       | -0.482106 | -2.141819 | -1.628422 |
| H       | -1.999168 | 2.339247  | -1.221843 | H       | 0.239579  | -0.022208 | -1.755738 |
| H       | 2.42245   | 0.326458  | -1.496131 | H       | -2.25958  | 0.938414  | 1.380751  |
| H       | 3.999993  | 0.277121  | 0.898941  | H       | -2.81084  | 1.409794  | -0.239314 |
| H       | 3.644724  | -1.396469 | 0.416589  | H       | 0.979644  | 2.435651  | -0.80958  |
| H       | 4.487392  | -0.30681  | -0.709798 | H       | -0.481745 | 2.222828  | -1.793577 |
|         |           |           |           | H       | -0.324057 | 2.331674  | 1.263465  |
| (b) tFd |           |           |           | H       | -1.376596 | 3.296771  | 0.212949  |
| N       | -1.149295 | 0.051238  | -0.294793 | H       | 2.484264  | -0.103147 | -1.45191  |
| C       | 0.153133  | 0.507856  | -0.766792 | H       | 3.501293  | -1.48005  | 0.835378  |
| C       | -1.960605 | 1.13336   | 0.291704  | H       | 4.455241  | -0.591241 | -0.373899 |
| C       | 0.032922  | 2.041336  | -0.695994 | H       | 3.817191  | 0.256899  | 1.054407  |
| C       | 1.26815   | -0.004597 | 0.142344  |         |           |           |           |
| O       | 1.105361  | -0.140683 | 1.365716  | (d) tAd |           |           |           |
| C       | -0.956328 | 2.27552   | 0.449486  | N       | -1.009906 | 0.176963  | -0.131673 |
| C       | -1.419841 | -1.263016 | -0.226138 | C       | 0.17119   | 0.623425  | -0.865986 |
| O       | -0.594709 | -2.105377 | -0.632929 | C       | -1.517998 | 1.194957  | 0.807979  |
| C       | -2.744817 | -1.666194 | 0.361693  | C       | 0.195531  | 2.136581  | -0.586993 |
| N       | 2.440998  | -0.24068  | -0.454522 | C       | 1.470978  | -0.04191  | -0.418133 |
| C       | 3.614197  | -0.648819 | 0.300044  | O       | 2.500657  | 0.123726  | -1.096438 |
| H       | -2.921537 | -2.721506 | 0.151531  | C       | -0.406501 | 2.244433  | 0.817134  |
| H       | -3.563277 | -1.065371 | -0.044891 | C       | -1.577061 | -1.023068 | -0.365824 |
| H       | -2.724104 | -1.517146 | 1.447198  | O       | -1.084026 | -1.817907 | -1.187362 |
| H       | 0.331444  | 0.158704  | -1.788135 | C       | -2.813233 | -1.356586 | 0.42438   |
| H       | -2.391968 | 0.815693  | 1.243322  |         |           |           |           |
| H       | -2.773706 | 1.402219  | -0.392038 |         |           |           |           |

|   |           |           |           |
|---|-----------|-----------|-----------|
| N | 1.463499  | -0.755127 | 0.709434  |
| C | 2.665291  | -1.397895 | 1.214543  |
| H | -3.243725 | -2.280513 | 0.037494  |
| H | -3.550605 | -0.55048  | 0.366321  |
| H | -2.552632 | -1.495284 | 1.479646  |
| H | 0.063672  | 0.401255  | -1.931221 |
| H | -1.697013 | 0.754804  | 1.792035  |
| H | -2.458985 | 1.610571  | 0.43067   |
| H | 1.201722  | 2.553501  | -0.66716  |
| H | -0.448513 | 2.636763  | -1.316937 |
| H | 0.34439   | 1.992444  | 1.573244  |
| H | -0.793253 | 3.241798  | 1.036484  |
| H | 0.59251   | -0.852332 | 1.218337  |
| H | 3.049253  | -2.12018  | 0.489143  |
| H | 3.441415  | -0.65466  | 1.416497  |
| H | 2.414379  | -1.916722 | 2.138917  |

(e) ts1

|   |           |           |           |
|---|-----------|-----------|-----------|
| N | 0.871209  | -0.062098 | -0.331233 |
| C | -0.033224 | 0.590384  | 0.651485  |
| C | 1.689384  | 1.003796  | -0.968722 |
| C | 0.117488  | 2.110136  | 0.406384  |
| C | -1.484077 | 0.149959  | 0.497882  |
| O | -2.336269 | 0.55618   | 1.311586  |
| C | 0.739299  | 2.190369  | -0.987911 |
| C | 1.687592  | -1.093887 | 0.25934   |
| O | 2.5071    | -0.838608 | 1.121705  |
| C | 1.456776  | -2.472459 | -0.268432 |
| N | -1.78522  | -0.652319 | -0.52127  |
| C | -3.129094 | -1.160537 | -0.732455 |
| H | 2.113642  | -3.19421  | 0.218143  |
| H | 1.624813  | -2.473437 | -1.35105  |
| H | 0.407764  | -2.744861 | -0.106775 |
| H | 0.246043  | 0.342791  | 1.682173  |
| H | 2.016741  | 0.674858  | -1.958533 |
| H | 2.572998  | 1.238761  | -0.359759 |
| H | -0.836584 | 2.634433  | 0.497769  |
| H | 0.80978   | 2.524689  | 1.144927  |
| H | -0.021278 | 2.058847  | -1.765285 |
| H | 1.261114  | 3.133908  | -1.165458 |
| H | -1.013143 | -0.960856 | -1.102024 |
| H | -3.119537 | -1.804321 | -1.611364 |
| H | -3.465563 | -1.738104 | 0.133258  |
| H | -3.830233 | -0.338716 | -0.900271 |

(f) ts3

|   |           |           |           |
|---|-----------|-----------|-----------|
| N | 0.79029   | -0.118796 | -0.437223 |
| C | -0.033248 | 0.520936  | 0.616262  |
| C | 1.625695  | 0.932329  | -1.077117 |
| C | 0.204885  | 2.03845   | 0.467061  |
| C | -1.50793  | 0.152513  | 0.493939  |
| O | -2.329031 | 0.624964  | 1.303009  |
| C | 0.759143  | 2.176963  | -0.951474 |
| C | 1.56741   | -1.22191  | 0.043218  |

|   |           |           |           |
|---|-----------|-----------|-----------|
| O | 1.426531  | -2.320713 | -0.459973 |
| C | 2.571366  | -0.989881 | 1.144714  |
| N | -1.855282 | -0.690346 | -0.476563 |
| C | -3.224155 | -1.14404  | -0.644406 |
| H | 2.414698  | -1.729119 | 1.934769  |
| H | 2.522114  | 0.01712   | 1.562956  |
| H | 3.571536  | -1.152717 | 0.729064  |
| H | 0.257921  | 0.185014  | 1.620765  |
| H | 1.849764  | 0.64947   | -2.108141 |
| H | 2.573375  | 1.074478  | -0.53704  |
| H | -0.706793 | 2.613108  | 0.645064  |
| H | 0.958803  | 2.356931  | 1.19347   |
| H | -0.048556 | 2.151795  | -1.69129  |
| H | 1.335556  | 3.093929  | -1.0946   |
| H | -1.113802 | -1.026866 | -1.081232 |
| H | -3.25002  | -1.866325 | -1.45958  |
| H | -3.584241 | -1.622403 | 0.270656  |
| H | -3.884413 | -0.306583 | -0.885835 |

**Ac-ψ(CS–NH)Pro–NHMe**

(a) tFu

|   |           |           |           |
|---|-----------|-----------|-----------|
| N | -1.096045 | 0.195605  | -0.025584 |
| C | 0.166361  | 0.763323  | -0.511808 |
| C | -2.063815 | 1.25587   | 0.334504  |
| C | -0.002169 | 2.276851  | -0.289348 |
| C | 1.373583  | 0.251979  | 0.265469  |
| O | 1.323535  | 0.049226  | 1.48817   |
| C | -1.512614 | 2.482669  | -0.381674 |
| C | -1.355152 | -1.107715 | -0.003036 |
| S | -0.27171  | -2.262809 | -0.583015 |
| C | -2.698591 | -1.505261 | 0.548483  |
| N | 2.508504  | 0.161966  | -0.435565 |
| C | 3.748995  | -0.278231 | 0.180062  |
| H | -2.732875 | -2.582389 | 0.703872  |
| H | -3.488778 | -1.22813  | -0.159762 |
| H | -2.903348 | -0.993923 | 1.495121  |
| H | 0.281203  | 0.524678  | -1.575432 |
| H | -2.070522 | 1.393628  | 1.422045  |
| H | -3.065844 | 0.980646  | 0.004366  |
| H | 0.348894  | 2.53845   | 0.715405  |
| H | 0.568174  | 2.850979  | -1.021877 |
| H | -1.844461 | 3.411628  | 0.086672  |
| H | -1.834684 | 2.480165  | -1.428082 |
| H | 2.466494  | 0.261312  | -1.443208 |
| H | 4.022797  | 0.387047  | 1.002684  |
| H | 3.650945  | -1.296861 | 0.568479  |
| H | 4.534285  | -0.256007 | -0.574685 |

(b) tAd

|   |           |          |           |
|---|-----------|----------|-----------|
| N | -0.840012 | 0.566923 | -0.078032 |
| C | 0.344918  | 0.531629 | -0.938065 |
| C | -0.997142 | 1.87611  | 0.598271  |
| C | 0.768217  | 2.007392 | -1.020625 |

|   |           |           |           |
|---|-----------|-----------|-----------|
| C | 1.470887  | -0.339016 | -0.384282 |
| O | 2.348415  | -0.758623 | -1.157868 |
| C | 0.33113   | 2.580462  | 0.329114  |
| C | -1.680401 | -0.459532 | 0.048332  |
| S | -1.444474 | -1.928564 | -0.744205 |
| C | -2.858498 | -0.233035 | 0.955496  |
| N | 1.509507  | -0.55762  | 0.93239   |
| C | 2.546379  | -1.377723 | 1.537032  |
| H | -3.541698 | -1.079049 | 0.902084  |
| H | -3.391514 | 0.683955  | 0.680888  |
| H | -2.513926 | -0.120302 | 1.990681  |
| H | 0.083967  | 0.115223  | -1.913497 |
| H | -1.198004 | 1.728957  | 1.661489  |
| H | -1.839381 | 2.414209  | 0.149511  |
| H | 1.837708  | 2.114772  | -1.21626  |
| H | 0.215709  | 2.485747  | -1.835013 |
| H | 1.056756  | 2.325499  | 1.10811   |
| H | 0.214564  | 3.665833  | 0.310184  |
| H | 0.737465  | -0.23558  | 1.505039  |
| H | 2.523231  | -2.392926 | 1.129545  |
| H | 3.533198  | -0.944776 | 1.354548  |
| H | 2.366788  | -1.418395 | 2.610766  |

(c) tFd

|   |           |           |           |
|---|-----------|-----------|-----------|
| N | -1.051909 | 0.357372  | -0.15758  |
| C | 0.270559  | 0.54352   | -0.753972 |
| C | -1.64673  | 1.638275  | 0.284739  |
| C | 0.354548  | 2.065569  | -0.960359 |
| C | 1.361812  | 0.05155   | 0.196436  |
| O | 1.226348  | 0.103542  | 1.428879  |
| C | -0.488976 | 2.628099  | 0.184714  |
| C | -1.62042  | -0.833211 | -0.00652  |
| S | -0.862677 | -2.268986 | -0.471846 |
| C | -2.989882 | -0.835269 | 0.615553  |
| N | 2.491636  | -0.361952 | -0.385086 |
| C | 3.632542  | -0.803107 | 0.398833  |
| H | -3.440397 | -1.822452 | 0.525454  |
| H | -3.639658 | -0.092715 | 0.139966  |
| H | -2.911206 | -0.578402 | 1.679114  |
| H | 0.330095  | -0.008519 | -1.695467 |
| H | -2.042572 | 1.540502  | 1.297422  |
| H | -2.46652  | 1.904965  | -0.391997 |
| H | 1.386252  | 2.424463  | -0.960301 |
| H | -0.098937 | 2.311633  | -1.925699 |
| H | 0.084401  | 2.632934  | 1.116454  |
| H | -0.841984 | 3.642974  | -0.010012 |
| H | 2.527951  | -0.432703 | -1.395225 |
| H | 3.97      | -0.006132 | 1.066498  |
| H | 3.375012  | -1.680891 | 0.998842  |
| H | 4.440795  | -1.060715 | -0.284432 |

(d) cFd

|   |           |          |          |
|---|-----------|----------|----------|
| N | 0.846774  | 0.356499 | 0.250485 |
| C | -0.514115 | 0.415364 | 0.791184 |

|   |           |           |           |
|---|-----------|-----------|-----------|
| C | 1.231116  | 1.624538  | -0.394405 |
| C | -0.769809 | 1.927019  | 0.898796  |
| C | -1.498918 | -0.251577 | -0.174719 |
| O | -1.215197 | -0.451878 | -1.365036 |
| C | -0.030357 | 2.48421   | -0.318539 |
| C | 1.610066  | -0.730911 | 0.254366  |
| S | 3.153874  | -0.747536 | -0.426288 |
| C | 1.039438  | -1.952481 | 0.927028  |
| N | -2.683547 | -0.578661 | 0.350223  |
| C | -3.75274  | -1.129112 | -0.466981 |
| H | 1.718732  | -2.794403 | 0.805377  |
| H | 0.063839  | -2.220722 | 0.50433   |
| H | 0.899806  | -1.761452 | 1.997568  |
| H | -0.566559 | -0.077173 | 1.764948  |
| H | 1.566536  | 1.427764  | -1.415721 |
| H | 2.06848   | 2.06237   | 0.16016   |
| H | -1.834931 | 2.167709  | 0.915141  |
| H | -0.314228 | 2.289272  | 1.825664  |
| H | -0.633313 | 2.351335  | -1.222369 |
| H | 0.208754  | 3.54477   | -0.217361 |
| H | -2.862114 | -0.369125 | 1.326201  |
| H | -3.439902 | -2.073557 | -0.919767 |
| H | -4.616015 | -1.307872 | 0.172659  |
| H | -4.030173 | -0.430475 | -1.261271 |

(e) ts1

|   |           |           |           |
|---|-----------|-----------|-----------|
| N | -0.574089 | 0.087369  | 0.496918  |
| C | 0.272051  | 0.579724  | -0.618337 |
| C | -1.084851 | 1.261115  | 1.251577  |
| C | 0.322773  | 2.112094  | -0.442274 |
| C | 1.676983  | -0.013802 | -0.602647 |
| O | 2.466741  | 0.265801  | -1.525718 |
| C | 0.001399  | 2.303965  | 1.039533  |
| C | -1.583353 | -0.856822 | 0.115489  |
| S | -2.841888 | -0.472037 | -0.854005 |
| C | -1.369946 | -2.219802 | 0.684103  |
| N | 2.012286  | -0.805174 | 0.414697  |
| C | 3.323523  | -1.421884 | 0.507287  |
| H | -2.16899  | -2.912119 | 0.419129  |
| H | -1.280891 | -2.143382 | 1.775226  |
| H | -0.409365 | -2.606255 | 0.317735  |
| H | -0.155566 | 0.313163  | -1.591507 |
| H | -1.245391 | 0.986673  | 2.297749  |
| H | -2.034095 | 1.61412   | 0.826142  |
| H | 1.284227  | 2.529267  | -0.750535 |
| H | -0.463803 | 2.566202  | -1.053263 |
| H | 0.8752    | 2.081274  | 1.6621    |
| H | -0.348326 | 3.31257   | 1.273056  |
| H | 1.287854  | -1.015461 | 1.092967  |
| H | 3.374481  | -1.988161 | 1.436609  |
| H | 3.497801  | -2.09799  | -0.334986 |
| H | 4.104289  | -0.656608 | 0.50971   |

**Ac-ψ(CSe-NH)Pro-NHMe**

|         |           |           |           |         |           |           |           |
|---------|-----------|-----------|-----------|---------|-----------|-----------|-----------|
| (a) tFu |           |           |           | H       | 3.795699  | -2.66837  | -0.166691 |
| N       | -0.955882 | 0.745063  | 0.022981  | (c) tAd |           |           |           |
| C       | 0.374639  | 1.043853  | -0.523367 | N       | 0.018955  | 1.089912  | -0.012918 |
| C       | -1.713119 | 1.987975  | 0.301921  | C       | 0.868329  | 0.312744  | -0.922488 |
| C       | 0.481235  | 2.57445   | -0.421837 | C       | 0.711346  | 2.301912  | 0.488562  |
| C       | 1.482057  | 0.384314  | 0.2931    | C       | 2.049982  | 1.25333   | -1.20495  |
| O       | 1.384796  | 0.238524  | 1.521216  | C       | 1.333363  | -1.016201 | -0.330108 |
| C       | -0.971422 | 3.036709  | -0.516222 | O       | 1.758887  | -1.895192 | -1.097463 |
| C       | -1.438814 | -0.470713 | 0.181355  | C       | 2.163001  | 2.086292  | 0.073127  |
| Se      | -0.535819 | -1.96495  | -0.356189 | C       | -1.227542 | 0.768325  | 0.284456  |
| C       | -2.816899 | -0.568011 | 0.768762  | Se      | -2.029405 | -0.72338  | -0.395735 |
| N       | 2.599853  | 0.094541  | -0.379109 | C       | -1.960261 | 1.721586  | 1.181087  |
| C       | 3.743755  | -0.502287 | 0.290593  | N       | 1.3253    | -1.162382 | 0.997091  |
| H       | -3.048312 | -1.599326 | 1.029491  | C       | 1.752219  | -2.402498 | 1.624152  |
| H       | -3.552758 | -0.219051 | 0.03369   | H       | -3.01008  | 1.445103  | 1.259757  |
| H       | -2.908035 | 0.063293  | 1.658968  | H       | -1.879182 | 2.745279  | 0.798894  |
| H       | 0.416622  | 0.7049    | -1.564791 | H       | -1.513993 | 1.706588  | 2.183389  |
| H       | -1.666937 | 2.204037  | 1.37549   | H       | 0.309224  | 0.068654  | -1.828436 |
| H       | -2.755449 | 1.867827  | 0.006576  | H       | 0.5765    | 2.390779  | 1.568107  |
| H       | 0.899053  | 2.847607  | 0.553858  | H       | 0.2768    | 3.182347  | 0.002698  |
| H       | 1.124511  | 2.978316  | -1.205492 | H       | 2.958651  | 0.699315  | -1.45067  |
| H       | -1.124636 | 4.042597  | -0.120544 | H       | 1.791621  | 1.891405  | -2.055253 |
| H       | -1.31382  | 3.009698  | -1.555809 | H       | 2.69636   | 1.52855   | 0.84929   |
| H       | 2.599065  | 0.169907  | -1.389662 | H       | 2.679759  | 3.034804  | -0.085339 |
| H       | 4.106387  | 0.152493  | 1.086749  | H       | 0.915828  | -0.434461 | 1.571987  |
| H       | 3.47246   | -1.470445 | 0.72325   | H       | 1.164433  | -3.245097 | 1.248022  |
| H       | 4.534926  | -0.646699 | -0.444005 | H       | 2.809631  | -2.591367 | 1.421069  |
|         |           |           |           | H       | 1.600706  | -2.311092 | 2.69894   |
| (b) tFd |           |           |           | (d) cFd |           |           |           |
| N       | -0.483229 | 1.075362  | -0.126147 | N       | 0.272552  | 0.501364  | 0.301067  |
| C       | 0.740921  | 0.577229  | -0.758058 | C       | -1.111792 | 0.459633  | 0.791953  |
| C       | -0.367553 | 2.504981  | 0.24688   | C       | 0.583437  | 1.797317  | -0.33249  |
| C       | 1.527146  | 1.860378  | -1.071362 | C       | -1.501337 | 1.944436  | 0.852131  |
| C       | 1.494845  | -0.324397 | 0.221881  | C       | -1.996409 | -0.312465 | -0.191001 |
| O       | 1.374688  | -0.197628 | 1.4502    | O       | -1.662357 | -0.491235 | -1.371142 |
| C       | 1.112618  | 2.813937  | 0.049694  | C       | -0.748021 | 2.54473   | -0.335499 |
| C       | -1.528534 | 0.322201  | 0.146026  | C       | 1.109411  | -0.512826 | 0.37344   |
| Se      | -1.587368 | -1.453028 | -0.282717 | Se      | 2.829399  | -0.396211 | -0.231196 |
| C       | -2.692691 | 1.009848  | 0.796629  | C       | 0.606272  | -1.763637 | 1.036556  |
| N       | 2.337567  | -1.202076 | -0.329049 | N       | -3.155075 | -0.750539 | 0.309508  |
| C       | 3.183385  | -2.053648 | 0.491892  | C       | -4.137356 | -1.424698 | -0.524348 |
| H       | -3.568298 | 0.362883  | 0.802526  | H       | 1.35181   | -2.55427  | 0.972667  |
| H       | -2.931911 | 1.943614  | 0.276409  | H       | -0.321854 | -2.114506 | 0.570271  |
| H       | -2.436408 | 1.263478  | 1.83314   | H       | 0.39546   | -1.562904 | 2.093905  |
| H       | 0.490424  | 0.012755  | -1.660025 | H       | -1.15408  | -0.011416 | 1.776242  |
| H       | -0.705386 | 2.648777  | 1.274801  | H       | 0.991092  | 1.623887  | -1.33113  |
| H       | -1.000371 | 3.099737  | -0.420794 | H       | 1.347154  | 2.302677  | 0.269043  |
| H       | 2.603398  | 1.68184   | -1.117593 | H       | -2.582807 | 2.088616  | 0.805859  |
| H       | 1.195855  | 2.242653  | -2.041796 | H       | -1.133959 | 2.361894  | 1.794491  |
| H       | 1.669074  | 2.590073  | 0.965023  | H       | -1.289161 | 2.348693  | -1.266233 |
| H       | 1.275052  | 3.862968  | -0.205572 | H       | -0.604637 | 3.622884  | -0.241231 |
| H       | 2.377387  | -1.281987 | -1.338536 | H       | -3.372802 | -0.561414 | 1.281649  |
| H       | 3.833768  | -1.447756 | 1.128292  |         |           |           |           |
| H       | 2.573531  | -2.702891 | 1.126477  |         |           |           |           |

|   |           |           |           |
|---|-----------|-----------|-----------|
| H | -3.728439 | -2.358265 | -0.919866 |
| H | -5.010741 | -1.648465 | 0.086602  |
| H | -4.435321 | -0.787062 | -1.360967 |

(e) ts1

|    |           |           |           |
|----|-----------|-----------|-----------|
| N  | -0.054594 | 0.313523  | 0.628438  |
| C  | 0.727798  | 0.608565  | -0.595904 |
| C  | -0.511631 | 1.604353  | 1.193713  |
| C  | 1.025996  | 2.129244  | -0.518938 |
| C  | 2.019744  | -0.189177 | -0.689871 |
| O  | 2.636405  | -0.226684 | -1.77213  |
| C  | 0.681268  | 2.503936  | 0.925349  |
| C  | -1.083773 | -0.659445 | 0.4652    |
| Se | -2.539216 | -0.348756 | -0.482828 |
| C  | -0.829352 | -1.926683 | 1.202531  |
| N  | 2.467765  | -0.779795 | 0.41683   |
| C  | 3.68887   | -1.566408 | 0.430706  |
| H  | -1.643757 | -2.644437 | 1.106151  |
| H  | -0.65456  | -1.690743 | 2.260464  |
| H  | 0.101372  | -2.374787 | 0.828517  |
| H  | 0.156619  | 0.3742    | -1.501951 |
| H  | -0.753101 | 1.474683  | 2.252172  |
| H  | -1.400314 | 1.976784  | 0.666381  |
| H  | 2.057865  | 2.356414  | -0.798416 |
| H  | 0.361642  | 2.657025  | -1.209079 |
| H  | 1.505287  | 2.260138  | 1.604195  |
| H  | 0.435291  | 3.562827  | 1.037573  |
| H  | 1.868579  | -0.737011 | 1.234505  |
| H  | 3.812632  | -1.994879 | 1.424652  |
| H  | 3.634867  | -2.372952 | -0.306124 |
| H  | 4.553957  | -0.9385   | 0.20057   |

**Ac-Pro-ψ(CS-NH)Me**

(a) cAd

|   |           |           |           |
|---|-----------|-----------|-----------|
| N | -1.064728 | 0.230017  | -0.50978  |
| C | -0.099829 | -0.607151 | 0.242479  |
| C | -2.116098 | -0.664461 | -1.088887 |
| C | -0.300635 | -2.017002 | -0.335862 |
| C | 1.335172  | -0.120238 | 0.11365   |
| S | 2.5542    | -0.839315 | 1.023197  |
| C | -1.81066  | -2.061758 | -0.552026 |
| C | -1.625106 | 1.278331  | 0.29353   |
| O | -1.425191 | 2.439244  | -0.009866 |
| C | -2.434125 | 0.916322  | 1.513289  |
| N | 1.534343  | 0.855767  | -0.749722 |
| C | 2.819406  | 1.47195   | -1.021849 |
| H | -3.326417 | 1.545665  | 1.553799  |
| H | -1.828622 | 1.138056  | 2.399363  |
| H | -2.715547 | -0.138055 | 1.53725   |
| H | -0.334736 | -0.625289 | 1.315725  |
| H | -2.035465 | -0.628177 | -2.178953 |
| H | -3.116509 | -0.310146 | -0.817733 |
| H | 0.234209  | -2.100621 | -1.289701 |

|   |           |           |           |
|---|-----------|-----------|-----------|
| H | 0.072904  | -2.783343 | 0.344985  |
| H | -2.122775 | -2.845969 | -1.246091 |
| H | -2.317266 | -2.222163 | 0.406291  |
| H | 0.700693  | 1.218763  | -1.210654 |
| H | 3.513955  | 0.738786  | -1.440646 |
| H | 2.6641    | 2.279699  | -1.735909 |
| H | 3.249753  | 1.871428  | -0.099374 |

(b) cFd

|   |           |           |           |
|---|-----------|-----------|-----------|
| N | -1.31081  | 0.022047  | -0.287105 |
| C | -0.044072 | 0.405216  | -0.894666 |
| C | -2.032593 | 1.153647  | 0.313369  |
| C | -0.18793  | 1.934726  | -1.035492 |
| C | 1.17639   | 0.033715  | -0.049362 |
| S | 1.150577  | -0.001847 | 1.626298  |
| C | -1.078572 | 2.337165  | 0.144497  |
| C | -1.733144 | -1.242413 | -0.113854 |
| O | -2.79135  | -1.482052 | 0.499995  |
| C | -0.894909 | -2.35073  | -0.696876 |
| N | 2.257546  | -0.218475 | -0.772128 |
| C | 3.569268  | -0.505511 | -0.218788 |
| H | -1.439257 | -3.290721 | -0.601669 |
| H | 0.054193  | -2.435214 | -0.15575  |
| H | -0.668527 | -2.166479 | -1.75124  |
| H | 0.06212   | -0.065189 | -1.877371 |
| H | -2.257264 | 0.935289  | 1.361063  |
| H | -2.979115 | 1.302521  | -0.218168 |
| H | 0.780034  | 2.441681  | -1.040065 |
| H | -0.691757 | 2.141416  | -1.98485  |
| H | -0.475844 | 2.462156  | 1.047502  |
| H | -1.615527 | 3.269238  | -0.044971 |
| H | 2.175311  | -0.191798 | -1.785099 |
| H | 3.52882   | -1.399448 | 0.409563  |
| H | 4.256675  | -0.670982 | -1.047397 |
| H | 3.917924  | 0.3336    | 0.389386  |

(c) tFu

|   |           |           |           |
|---|-----------|-----------|-----------|
| N | -1.233976 | -0.015267 | -0.212001 |
| C | -0.027179 | 0.670922  | -0.663525 |
| C | -2.182833 | 0.895266  | 0.440866  |
| C | -0.273535 | 2.142889  | -0.268068 |
| C | 1.24615   | 0.128634  | -0.018528 |
| S | 1.32731   | -0.273765 | 1.608464  |
| C | -1.797297 | 2.244596  | -0.157466 |
| C | -1.378001 | -1.340433 | -0.37114  |
| O | -0.515792 | -2.012429 | -0.971854 |
| C | -2.623516 | -1.970174 | 0.19358   |
| N | 2.284383  | 0.079514  | -0.837693 |
| C | 3.624543  | -0.32109  | -0.44758  |
| H | -2.5492   | -3.053371 | 0.09326   |
| H | -3.507739 | -1.619153 | -0.349082 |
| H | -2.750827 | -1.705498 | 1.248149  |
| H | 0.055308  | 0.567986  | -1.752815 |
| H | -2.032142 | 0.881019  | 1.527816  |

|   |           |           |           |
|---|-----------|-----------|-----------|
| H | -3.21098  | 0.604189  | 0.21966   |
| H | 0.181837  | 2.336936  | 0.708345  |
| H | 0.161379  | 2.827009  | -0.999247 |
| H | -2.118334 | 3.08184   | 0.466143  |
| H | -2.247777 | 2.351851  | -1.149759 |
| H | 2.13603   | 0.320074  | -1.814182 |
| H | 4.0167    | 0.35519   | 0.316815  |
| H | 3.613039  | -1.337409 | -0.044721 |
| H | 4.259257  | -0.284385 | -1.33195  |

(d) tAu

|   |           |           |           |
|---|-----------|-----------|-----------|
| N | -1.221859 | 0.042803  | -0.065236 |
| C | -0.014318 | 0.735054  | -0.526064 |
| C | -2.09199  | 0.912697  | 0.743541  |
| C | -0.154021 | 2.149684  | 0.079618  |
| C | 1.282248  | 0.075197  | -0.079309 |
| S | 2.695908  | 0.343786  | -0.943701 |
| C | -1.661051 | 2.306464  | 0.295273  |
| C | -1.512012 | -1.198923 | -0.501706 |
| O | -0.735979 | -1.800927 | -1.266895 |
| C | -2.801647 | -1.81753  | -0.032357 |
| N | 1.219294  | -0.633213 | 1.034056  |
| C | 2.352729  | -1.301983 | 1.64872   |
| H | -2.792577 | -2.879414 | -0.279798 |
| H | -3.64623  | -1.340005 | -0.541341 |
| H | -2.939879 | -1.689636 | 1.044853  |
| H | -0.008338 | 0.769256  | -1.619059 |
| H | -1.895106 | 0.752776  | 1.810887  |
| H | -3.142819 | 0.702865  | 0.539323  |
| H | 0.368365  | 2.191527  | 1.042027  |
| H | 0.275947  | 2.904959  | -0.58027  |
| H | -1.903295 | 3.073213  | 1.034327  |
| H | -2.157152 | 2.55653   | -0.648554 |
| H | 0.305722  | -0.751574 | 1.467064  |
| H | 2.786977  | -2.026391 | 0.954     |
| H | 3.120976  | -0.573252 | 1.920741  |
| H | 1.999028  | -1.815104 | 2.542152  |

(e) cFu

|   |           |           |           |
|---|-----------|-----------|-----------|
| N | 1.291401  | 0.095417  | -0.199649 |
| C | 0.117071  | -0.636649 | -0.676751 |
| C | 2.290636  | -0.79016  | 0.407719  |
| C | 0.44615   | -2.108666 | -0.336531 |
| C | -1.19077  | -0.213816 | -0.009945 |
| S | -1.294972 | 0.140217  | 1.626521  |
| C | 1.972674  | -2.13342  | -0.238749 |
| C | 1.433812  | 1.432558  | -0.196775 |
| O | 2.406777  | 1.971261  | 0.366866  |
| C | 0.397389  | 2.263776  | -0.909046 |
| N | -2.231328 | -0.216265 | -0.827293 |
| C | -3.595611 | 0.082061  | -0.427156 |
| H | 0.852629  | 3.216935  | -1.183365 |
| H | -0.441906 | 2.464173  | -0.233738 |
| H | 0.011037  | 1.773653  | -1.806438 |

|   |           |           |           |
|---|-----------|-----------|-----------|
| H | 0.022788  | -0.512292 | -1.762565 |
| H | 2.157835  | -0.818647 | 1.496884  |
| H | 3.293439  | -0.421125 | 0.185278  |
| H | 0.009441  | -2.361076 | 0.635056  |
| H | 0.038272  | -2.785487 | -1.089733 |
| H | 2.339649  | -2.976681 | 0.350484  |
| H | 2.421337  | -2.180358 | -1.236553 |
| H | -2.067643 | -0.413017 | -1.81142  |
| H | -3.655834 | 1.091908  | -0.011849 |
| H | -4.229368 | 0.00938   | -1.309945 |
| H | -3.934951 | -0.629096 | 0.330641  |

(f) ts4

|   |           |           |           |
|---|-----------|-----------|-----------|
| N | -1.064728 | 0.230017  | -0.50978  |
| C | -0.099829 | -0.607151 | 0.242479  |
| C | -2.116098 | -0.664461 | -1.088887 |
| C | -0.300635 | -2.017002 | -0.335862 |
| C | 1.335172  | -0.120238 | 0.11365   |
| S | 2.5542    | -0.839315 | 1.023197  |
| C | -1.81066  | -2.061758 | -0.552026 |
| C | -1.625106 | 1.278331  | 0.29353   |
| O | -1.425191 | 2.439244  | -0.009866 |
| C | -2.434125 | 0.916322  | 1.513289  |
| N | 1.534343  | 0.855767  | -0.749722 |
| C | 2.819406  | 1.47195   | -1.021849 |
| H | -3.326417 | 1.545665  | 1.553799  |
| H | -1.828622 | 1.138056  | 2.399363  |
| H | -2.715547 | -0.138055 | 1.53725   |
| H | -0.334736 | -0.625289 | 1.315725  |
| H | -2.035465 | -0.628177 | -2.178953 |
| H | -3.116509 | -0.310146 | -0.817733 |
| H | 0.234209  | -2.100621 | -1.289701 |
| H | 0.072904  | -2.783343 | 0.344985  |
| H | -2.122775 | -2.845969 | -1.246091 |
| H | -2.317266 | -2.222163 | 0.406291  |
| H | 0.700693  | 1.218763  | -1.210654 |
| H | 3.513955  | 0.738786  | -1.440646 |
| H | 2.6641    | 2.279699  | -1.735909 |
| H | 3.249753  | 1.871428  | -0.099374 |

**Ac-Pro- $\psi$ (CSe-NH)Me**

(a) tFu

|    |           |           |           |
|----|-----------|-----------|-----------|
| N  | 1.496943  | 0.089694  | 0.422673  |
| C  | 0.368648  | 0.942782  | 0.77968   |
| C  | 2.358996  | 0.71222   | -0.59018  |
| C  | 0.614364  | 2.248995  | -0.010473 |
| C  | -0.965904 | 0.33866   | 0.378782  |
| Se | -1.17903  | -0.561245 | -1.186077 |
| C  | 2.105156  | 2.198504  | -0.358083 |
| C  | 1.500189  | -1.211382 | 0.772356  |
| O  | 0.674412  | -1.654438 | 1.592729  |
| C  | 2.540425  | -2.086765 | 0.130996  |
| N  | -1.95107  | 0.593822  | 1.206712  |

|   |           |           |           |
|---|-----------|-----------|-----------|
| C | -3.34413  | 0.231796  | 0.999254  |
| H | 2.370596  | -3.120839 | 0.431854  |
| H | 3.547093  | -1.779719 | 0.433182  |
| H | 2.476864  | -2.005143 | -0.959632 |
| H | 0.365241  | 1.123064  | 1.861048  |
| H | 2.045843  | 0.401997  | -1.59575  |
| H | 3.400711  | 0.425119  | -0.435901 |
| H | 0.015427  | 2.238373  | -0.926242 |
| H | 0.332076  | 3.122325  | 0.580301  |
| H | 2.353696  | 2.802031  | -1.233609 |
| H | 2.706845  | 2.545746  | 0.488221  |
| H | -1.733994 | 1.103438  | 2.061275  |
| H | -3.724359 | 0.6916    | 0.083571  |
| H | -3.440113 | -0.854129 | 0.919813  |
| H | -3.911784 | 0.590529  | 1.856983  |

(b) cAd

|    |           |           |           |
|----|-----------|-----------|-----------|
| N  | -1.712004 | 0.150028  | -0.174656 |
| C  | -0.390402 | 0.482478  | -0.703442 |
| C  | -2.353396 | 1.281853  | 0.519831  |
| C  | -0.414422 | 2.024631  | -0.690336 |
| C  | 0.755408  | -0.053292 | 0.148581  |
| Se | 2.440309  | -0.064827 | -0.53465  |
| C  | -1.257192 | 2.347566  | 0.546447  |
| C  | -2.34842  | -1.02957  | -0.339853 |
| O  | -3.488142 | -1.201745 | 0.124952  |
| C  | -1.64235  | -2.102721 | -1.128027 |
| N  | 0.459191  | -0.46598  | 1.357228  |
| C  | 1.409542  | -0.982309 | 2.329292  |
| H  | -2.183471 | -3.041551 | -1.007696 |
| H  | -0.604108 | -2.238556 | -0.810632 |
| H  | -1.634139 | -1.828426 | -2.188955 |
| H  | -0.261598 | 0.092772  | -1.715029 |
| H  | -2.685117 | 0.976296  | 1.515939  |
| H  | -3.230045 | 1.606257  | -0.051452 |
| H  | 0.588445  | 2.453943  | -0.667777 |
| H  | -0.923223 | 2.364417  | -1.59794  |
| H  | -0.653241 | 2.250833  | 1.455074  |
| H  | -1.671527 | 3.357418  | 0.51926   |
| H  | -0.52107  | -0.438678 | 1.636368  |
| H  | 0.856659  | -1.249814 | 3.228833  |
| H  | 1.914547  | -1.864794 | 1.926938  |
| H  | 2.15959   | -0.222184 | 2.562576  |

(c) tAd

|    |           |           |           |
|----|-----------|-----------|-----------|
| N  | -1.675193 | 0.202561  | -0.228766 |
| C  | -0.335715 | 0.613726  | -0.642088 |
| C  | -2.375376 | 1.234112  | 0.562312  |
| C  | -0.338102 | 2.124487  | -0.335297 |
| C  | 0.777267  | -0.101141 | 0.113165  |
| Se | 2.482662  | 0.004691  | -0.516765 |
| C  | -1.261305 | 2.231342  | 0.880975  |
| C  | -2.182426 | -0.991323 | -0.603146 |
| O  | -1.494949 | -1.799575 | -1.252202 |

|   |           |           |           |
|---|-----------|-----------|-----------|
| C | -3.596291 | -1.290839 | -0.186604 |
| N | 0.450054  | -0.727612 | 1.216539  |
| C | 1.372565  | -1.431187 | 2.093583  |
| H | -3.925822 | -2.205847 | -0.679366 |
| H | -4.267445 | -0.466942 | -0.44638  |
| H | -3.641171 | -1.430298 | 0.899319  |
| H | -0.189319 | 0.411071  | -1.70515  |
| H | -2.825177 | 0.795136  | 1.456186  |
| H | -3.164941 | 1.695677  | -0.041177 |
| H | 0.667097  | 2.511568  | -0.161263 |
| H | -0.772801 | 2.650524  | -1.191131 |
| H | -0.731145 | 1.930182  | 1.790816  |
| H | -1.650757 | 3.240575  | 1.029128  |
| H | -0.534356 | -0.731037 | 1.481865  |
| H | 1.886469  | -2.222261 | 1.541336  |
| H | 2.116279  | -0.736584 | 2.492829  |
| H | 0.794441  | -1.864364 | 2.908795  |

(d) tAu

|    |           |           |           |
|----|-----------|-----------|-----------|
| N  | -1.665636 | 0.10769   | -0.071605 |
| C  | -0.35835  | 0.677918  | -0.398273 |
| C  | -2.492379 | 1.03255   | 0.721773  |
| C  | -0.395806 | 2.078627  | 0.257322  |
| C  | 0.815247  | -0.110415 | 0.144995  |
| Se | 2.473732  | 0.194564  | -0.531601 |
| C  | -1.88913  | 2.389167  | 0.369883  |
| C  | -2.060481 | -1.056667 | -0.628391 |
| O  | -1.28655  | -1.700103 | -1.360143 |
| C  | -3.453782 | -1.535482 | -0.321795 |
| N  | 0.576605  | -0.904078 | 1.160553  |
| C  | 1.579901  | -1.664577 | 1.888403  |
| H  | -3.573247 | -2.546628 | -0.711487 |
| H  | -4.189447 | -0.878074 | -0.797425 |
| H  | -3.643896 | -1.529216 | 0.755447  |
| H  | -0.247404 | 0.751029  | -1.483644 |
| H  | -2.38415  | 0.809899  | 1.790383  |
| H  | -3.543517 | 0.943205  | 0.444825  |
| H  | 0.055754  | 2.028746  | 1.254146  |
| H  | 0.161739  | 2.803755  | -0.337255 |
| H  | -2.105966 | 3.147934  | 1.124885  |
| H  | -2.281859 | 2.72822   | -0.594295 |
| H  | -0.391808 | -0.999821 | 1.465137  |
| H  | 2.086823  | -2.362759 | 1.217068  |
| H  | 2.319973  | -0.986644 | 2.321751  |
| H  | 1.074413  | -2.21599  | 2.679914  |

(e) tFd

|    |           |           |           |
|----|-----------|-----------|-----------|
| N  | 1.494142  | 0.227945  | 0.489275  |
| C  | 0.282719  | 0.857618  | 0.98674   |
| C  | 2.159407  | 1.016578  | -0.565495 |
| C  | 0.430504  | 2.318118  | 0.522121  |
| C  | -0.976607 | 0.205455  | 0.426746  |
| Se | -1.035713 | -0.575817 | -1.209592 |
| C  | 1.228944  | 2.215277  | -0.781863 |



|   |           |           |           |
|---|-----------|-----------|-----------|
| C | 1.71867   | -1.077449 | 0.738529  |
| O | 0.997952  | -1.711472 | 1.532567  |
| C | 2.86122   | -1.726836 | 0.01      |
| N | -2.021032 | 0.298856  | 1.218537  |
| C | -3.366133 | -0.150341 | 0.898925  |
| H | 3.07493   | -2.693385 | 0.467336  |
| H | 3.759063  | -1.102764 | 0.019659  |
| H | 2.569367  | -1.881977 | -1.036202 |
| H | 0.245126  | 0.789291  | 2.078932  |
| H | 2.271549  | 0.416695  | -1.473233 |
| H | 3.152133  | 1.326516  | -0.223518 |
| H | -0.536821 | 2.811112  | 0.399183  |
| H | 1.000796  | 2.858822  | 1.283412  |
| H | 0.558559  | 2.024799  | -1.623353 |
| H | 1.791694  | 3.127179  | -0.993149 |
| H | -1.89019  | 0.73919   | 2.127418  |
| H | -3.73062  | 0.357612  | 0.002172  |
| H | -3.370716 | -1.229303 | 0.722118  |
| H | -4.008366 | 0.087636  | 1.745909  |

(f) ts3

|    |           |           |           |
|----|-----------|-----------|-----------|
| N  | -1.604641 | -0.111529 | 0.361589  |
| C  | -0.441113 | 0.520169  | -0.297539 |
| C  | -2.449636 | 0.952088  | 0.961672  |
| C  | -0.506005 | 2.011219  | 0.113487  |
| C  | 0.858718  | -0.14335  | 0.140638  |
| Se | 2.418106  | 0.235219  | -0.722263 |
| C  | -1.419485 | 2.005714  | 1.339576  |
| C  | -2.319763 | -1.010316 | -0.494509 |
| O  | -2.453237 | -2.174004 | -0.168184 |
| C  | -2.90859  | -0.486133 | -1.779213 |
| N  | 0.769803  | -0.972039 | 1.147764  |
| C  | 1.87034   | -1.702421 | 1.750073  |
| H  | -2.521195 | -1.07879  | -2.61312  |
| H  | -2.697071 | 0.57111   | -1.948356 |
| H  | -3.99241  | -0.635767 | -1.741606 |
| H  | -0.483893 | 0.424102  | -1.388528 |
| H  | -3.00556  | 0.548304  | 1.810905  |
| H  | -3.163499 | 1.358361  | 0.230133  |
| H  | 0.484419  | 2.430994  | 0.298591  |
| H  | -0.975312 | 2.57829   | -0.696474 |
| H  | -0.872414 | 1.694232  | 2.235846  |
| H  | -1.875957 | 2.980303  | 1.527794  |
| H  | -0.178697 | -1.112984 | 1.505165  |
| H  | 1.468211  | -2.30268  | 2.565254  |
| H  | 2.343013  | -2.352244 | 1.008475  |
| H  | 2.617736  | -1.005507 | 2.137763  |

**Ac-Ala-Pro-NHMe**

(a) FtFu

|   |           |           |           |
|---|-----------|-----------|-----------|
| H | -4.321209 | -1.832466 | -1.820286 |
| H | -5.427825 | -0.568165 | -1.265234 |
| H | -4.899803 | -1.841807 | -0.133614 |

|   |           |           |           |
|---|-----------|-----------|-----------|
| C | -4.591595 | -1.205776 | -0.965487 |
| O | -2.943451 | 0.481679  | -1.428073 |
| C | -3.416718 | -0.334921 | -0.618303 |
| N | -2.896497 | -0.468759 | 0.614065  |
| H | -3.247785 | -1.196101 | 1.227062  |
| C | -1.720211 | 0.277245  | 1.012753  |
| H | -1.946226 | 1.343407  | 0.936445  |
| C | -1.342061 | -0.069131 | 2.451256  |
| C | -0.534711 | -0.068558 | 0.110002  |
| O | -0.395547 | -1.212986 | -0.353201 |
| H | -0.463935 | 0.504953  | 2.759252  |
| H | -2.168005 | 0.173154  | 3.125821  |
| H | -1.111285 | -1.136109 | 2.538556  |
| N | 0.385944  | 0.885631  | -0.09072  |
| C | 0.346574  | 2.284799  | 0.37201   |
| C | 1.66956   | 0.540376  | -0.704438 |
| H | 1.528522  | 0.303786  | -1.765068 |
| C | 2.513101  | 1.815419  | -0.519257 |
| C | 2.318752  | -0.640657 | 0.009051  |
| O | 2.228167  | -0.785519 | 1.238555  |
| H | 3.061337  | 1.754912  | 0.427924  |
| H | 3.231522  | 1.940687  | -1.33138  |
| C | 1.466568  | 2.927093  | -0.441455 |
| H | 1.846543  | 3.83694   | 0.027737  |
| H | 1.098971  | 3.174268  | -1.443032 |
| H | 0.550602  | 2.334853  | 1.448477  |
| H | -0.627678 | 2.732277  | 0.169068  |
| N | 3.045478  | -1.4558   | -0.76024  |
| H | 3.058564  | -1.301651 | -1.761475 |
| C | 3.793908  | -2.568388 | -0.198682 |
| H | 4.521977  | -2.209612 | 0.533623  |
| H | 3.120519  | -3.277809 | 0.290076  |
| H | 4.31837   | -3.073416 | -1.008644 |

(b) EtFu

|   |           |           |           |
|---|-----------|-----------|-----------|
| H | -4.347299 | -2.244079 | -1.174801 |
| H | -5.434222 | -0.908942 | -1.640407 |
| H | -5.617636 | -1.678867 | -0.057879 |
| C | -4.888333 | -1.368315 | -0.811222 |
| O | -4.429231 | 0.723276  | 0.272521  |
| C | -3.978893 | -0.333771 | -0.205533 |
| N | -2.664587 | -0.605027 | -0.22129  |
| H | -2.330639 | -1.485299 | -0.601201 |
| C | -1.673087 | 0.294432  | 0.338999  |
| H | -1.96423  | 1.317025  | 0.087188  |
| C | -1.562419 | 0.142454  | 1.861811  |
| C | -0.329392 | -0.052185 | -0.284386 |
| O | -0.116553 | -1.199313 | -0.718135 |
| H | -0.856585 | 0.86599   | 2.279956  |
| H | -2.542336 | 0.308864  | 2.31739   |
| H | -1.221036 | -0.867083 | 2.113052  |
| N | 0.6226    | 0.887856  | -0.291757 |
| C | 0.525051  | 2.284544  | 0.166798  |
| C | 1.988445  | 0.527015  | -0.67818  |
| H | 2.018471  | 0.280771  | -1.745238 |

|   |           |           |           |
|---|-----------|-----------|-----------|
| C | 2.800136  | 1.799021  | -0.370352 |
| C | 2.485821  | -0.655818 | 0.145062  |
| O | 2.185316  | -0.778172 | 1.342974  |
| H | 3.194565  | 1.74247   | 0.6505    |
| H | 3.635333  | 1.915077  | -1.063369 |
| C | 1.761264  | 2.918492  | -0.46343  |
| H | 2.067226  | 3.825997  | 0.061197  |
| H | 1.558538  | 3.166236  | -1.510574 |
| H | 0.575125  | 2.329557  | 1.260737  |
| H | -0.408078 | 2.739061  | -0.169186 |
| N | 3.307116  | -1.500981 | -0.483422 |
| H | 3.480554  | -1.370349 | -1.473231 |
| C | 3.888     | -2.647517 | 0.195735  |
| H | 4.474937  | -2.326209 | 1.059909  |
| H | 3.105832  | -3.3323   | 0.535811  |
| H | 4.539767  | -3.167299 | -0.505274 |

## (c) AtFu

|   |           |           |           |
|---|-----------|-----------|-----------|
| H | 2.505586  | -0.848199 | -2.941095 |
| H | 3.694004  | -1.996732 | -2.31167  |
| H | 3.941753  | -0.246622 | -2.068961 |
| C | 3.196007  | -1.042922 | -2.115113 |
| O | 1.514374  | -2.030733 | -0.712556 |
| C | 2.399741  | -1.169659 | -0.845621 |
| N | 2.687676  | -0.310778 | 0.150587  |
| H | 3.332768  | 0.451569  | -0.029493 |
| C | 1.915137  | -0.292505 | 1.378505  |
| H | 1.976527  | -1.283979 | 1.837274  |
| C | 2.474096  | 0.744187  | 2.349347  |
| C | 0.414818  | -0.066406 | 1.173201  |
| O | -0.376078 | -0.672176 | 1.920645  |
| H | 1.89387   | 0.728277  | 3.275416  |
| H | 3.515003  | 0.508707  | 2.587664  |
| H | 2.428088  | 1.753118  | 1.927233  |
| N | -0.034886 | 0.802705  | 0.255463  |
| C | 0.72648   | 1.676922  | -0.659016 |
| C | -1.483167 | 0.990459  | 0.107476  |
| H | -1.887543 | 1.438257  | 1.02273   |
| C | -1.605136 | 1.956624  | -1.082182 |
| C | -2.20113  | -0.321903 | -0.181763 |
| O | -1.711079 | -1.180904 | -0.930951 |
| H | -1.653521 | 1.383167  | -2.01503  |
| H | -2.500799 | 2.575531  | -1.002843 |
| C | -0.298489 | 2.746723  | -1.02369  |
| H | -0.055022 | 3.23983   | -1.967241 |
| H | -0.346421 | 3.503466  | -0.2333   |
| H | 1.038049  | 1.113981  | -1.546991 |
| H | 1.608418  | 2.088484  | -0.167751 |
| N | -3.419578 | -0.446251 | 0.354166  |
| H | -3.756759 | 0.272608  | 0.983322  |
| C | -4.261375 | -1.598508 | 0.078715  |
| H | -4.436445 | -1.696298 | -0.996032 |
| H | -3.794333 | -2.517198 | 0.444324  |
| H | -5.215326 | -1.455274 | 0.584667  |

## (d) EtAu

|   |           |           |           |
|---|-----------|-----------|-----------|
| H | -5.471039 | -0.167896 | -1.652897 |
| H | -5.74275  | -1.285373 | -0.30741  |
| H | -4.530261 | -1.678769 | -1.556275 |
| C | -4.98105  | -0.872399 | -0.974013 |
| O | -4.325623 | 0.778635  | 0.640353  |
| C | -3.973939 | -0.115346 | -0.150768 |
| N | -2.683788 | -0.441483 | -0.327102 |
| H | -2.42963  | -1.173205 | -0.983306 |
| C | -1.605056 | 0.225373  | 0.376793  |
| H | -1.84619  | 1.290533  | 0.427982  |
| C | -1.411355 | -0.333341 | 1.791643  |
| C | -0.327656 | 0.009094  | -0.423594 |
| O | -0.2473   | -0.915936 | -1.249372 |
| H | -0.633644 | 0.217979  | 2.328717  |
| H | -2.347059 | -0.245432 | 2.35001   |
| H | -1.12592  | -1.389462 | 1.741909  |
| N | 0.722484  | 0.801753  | -0.156608 |
| C | 0.785016  | 1.980685  | 0.725088  |
| C | 2.003082  | 0.562111  | -0.827699 |
| H | 1.852453  | 0.546411  | -1.911246 |
| C | 2.885232  | 1.753181  | -0.389134 |
| C | 2.664179  | -0.755643 | -0.451316 |
| O | 3.537367  | -1.230922 | -1.197479 |
| H | 3.514412  | 1.457106  | 0.457622  |
| H | 3.534342  | 2.082615  | -1.201839 |
| C | 1.876699  | 2.813431  | 0.06059   |
| H | 2.310645  | 3.544648  | 0.74575   |
| H | 1.462043  | 3.341195  | -0.804498 |
| H | 1.08163   | 1.675911  | 1.736155  |
| H | -0.179691 | 2.486513  | 0.773227  |
| N | 2.331301  | -1.315293 | 0.714348  |
| H | 1.601607  | -0.891017 | 1.27669   |
| C | 2.964881  | -2.538704 | 1.179972  |
| H | 2.835623  | -3.339524 | 0.447018  |
| H | 4.033952  | -2.380328 | 1.346934  |
| H | 2.493746  | -2.831613 | 2.117601  |

## (e) FcBd

|   |           |           |           |
|---|-----------|-----------|-----------|
| H | -4.396115 | 1.953806  | -0.672521 |
| H | -4.949575 | 0.419229  | 0.05649   |
| H | -4.432118 | 0.476466  | -1.6475   |
| C | -4.245138 | 0.87198   | -0.644034 |
| O | -1.872452 | 1.161878  | -0.866259 |
| C | -2.813829 | 0.58853   | -0.287166 |
| N | -2.586711 | -0.320144 | 0.674967  |
| H | -3.371131 | -0.823903 | 1.074641  |
| C | -1.24068  | -0.734461 | 1.025175  |
| H | -0.715175 | 0.125813  | 1.451174  |
| C | -1.299258 | -1.864703 | 2.049034  |
| C | -0.515302 | -1.222718 | -0.234119 |
| O | -1.128375 | -1.854185 | -1.108079 |
| H | -0.28921  | -2.17553  | 2.329861  |
| H | -1.821557 | -1.526575 | 2.948446  |

|   |           |           |           |
|---|-----------|-----------|-----------|
| H | -1.828388 | -2.727257 | 1.631423  |
| N | 0.800242  | -0.978398 | -0.34367  |
| C | 1.544998  | -1.492847 | -1.509851 |
| C | 1.693359  | -0.373487 | 0.651001  |
| H | 1.387914  | -0.631701 | 1.668903  |
| C | 3.047054  | -1.001169 | 0.290998  |
| C | 1.770535  | 1.155375  | 0.583574  |
| O | 2.641102  | 1.743314  | 1.249384  |
| H | 3.883305  | -0.417662 | 0.678992  |
| H | 3.090938  | -2.009366 | 0.715023  |
| C | 2.986262  | -1.063146 | -1.236419 |
| H | 3.174784  | -0.070157 | -1.659852 |
| H | 3.707094  | -1.762324 | -1.664568 |
| H | 1.129931  | -1.07756  | -2.431727 |
| H | 1.441798  | -2.582879 | -1.54333  |
| N | 0.889776  | 1.802538  | -0.17996  |
| H | 0.100675  | 1.298339  | -0.58066  |
| C | 0.836392  | 3.255802  | -0.19068  |
| H | 0.022354  | 3.562158  | -0.847348 |
| H | 0.657738  | 3.64847   | 0.814961  |
| H | 1.775026  | 3.669667  | -0.567213 |

## (f) AtAu

|   |           |           |           |
|---|-----------|-----------|-----------|
| H | 1.855895  | 2.007473  | 2.571647  |
| H | 3.11425   | 2.848022  | 1.656676  |
| H | 3.404799  | 1.186837  | 2.235053  |
| C | 2.653976  | 1.871765  | 1.836584  |
| O | 1.115063  | 1.998176  | -0.0036   |
| C | 2.047073  | 1.385113  | 0.551488  |
| N | 2.546328  | 0.260653  | 0.014615  |
| H | 3.244093  | -0.267074 | 0.529869  |
| C | 1.99829   | -0.312829 | -1.202046 |
| H | 2.135283  | 0.407882  | -2.014583 |
| C | 2.723112  | -1.608793 | -1.554383 |
| C | 0.484712  | -0.537162 | -1.163332 |
| O | -0.154906 | -0.376059 | -2.217391 |
| H | 2.318873  | -2.013035 | -2.485643 |
| H | 3.788836  | -1.408421 | -1.697336 |
| H | 2.607341  | -2.359855 | -0.766755 |
| N | -0.132014 | -0.917314 | -0.030533 |
| C | 0.456053  | -1.312812 | 1.264379  |
| C | -1.589705 | -1.092366 | -0.034436 |
| H | -1.873159 | -1.803719 | -0.816569 |
| C | -1.907228 | -1.642362 | 1.371865  |
| C | -2.378739 | 0.184115  | -0.281592 |
| O | -3.586996 | 0.093774  | -0.569111 |
| H | -2.170035 | -0.815495 | 2.041631  |
| H | -2.74372  | -2.342321 | 1.343015  |
| C | -0.58978  | -2.275452 | 1.81792   |
| H | -0.514767 | -2.379917 | 2.902491  |
| H | -0.46245  | -3.261918 | 1.359705  |
| H | 0.56262   | -0.433608 | 1.913308  |
| H | 1.43113   | -1.779203 | 1.129399  |
| N | -1.767544 | 1.354039  | -0.094467 |
| H | -0.760201 | 1.38253   | 0.054635  |

|   |           |          |           |
|---|-----------|----------|-----------|
| C | -2.479056 | 2.609974 | -0.264487 |
| H | -2.87139  | 2.703202 | -1.281394 |
| H | -3.31107  | 2.679109 | 0.441371  |
| H | -1.78125  | 3.425604 | -0.074769 |

## (g) AtBd

|   |           |           |           |
|---|-----------|-----------|-----------|
| H | 3.055     | 3.172576  | 1.054767  |
| H | 3.245893  | 1.739804  | 2.099417  |
| H | 1.686542  | 2.60758   | 2.02394   |
| C | 2.557208  | 2.281084  | 1.447985  |
| O | 1.241549  | 1.881955  | -0.52222  |
| C | 2.08149   | 1.450175  | 0.290343  |
| N | 2.586972  | 0.212565  | 0.165109  |
| H | 3.188207  | -0.152495 | 0.896873  |
| C | 2.165139  | -0.67874  | -0.90071  |
| H | 2.490449  | -0.254776 | -1.856002 |
| C | 2.797077  | -2.056529 | -0.723784 |
| C | 0.647601  | -0.813238 | -1.054967 |
| O | 0.191256  | -0.87552  | -2.209504 |
| H | 2.498272  | -2.704829 | -1.551411 |
| H | 3.887226  | -1.968233 | -0.730511 |
| H | 2.485956  | -2.520318 | 0.217048  |
| N | -0.156217 | -0.922717 | 0.020412  |
| C | 0.205364  | -0.91736  | 1.458524  |
| C | -1.593397 | -1.133374 | -0.166679 |
| H | -1.7711   | -1.732827 | -1.062656 |
| C | -2.001699 | -1.863449 | 1.116392  |
| C | -2.378473 | 0.16697   | -0.344503 |
| O | -3.61712  | 0.113247  | -0.456279 |
| H | -3.07063  | -1.772439 | 1.318049  |
| H | -1.754255 | -2.924083 | 1.011467  |
| C | -1.122814 | -1.198904 | 2.176442  |
| H | -1.576616 | -0.25548  | 2.497374  |
| H | -0.975949 | -1.822596 | 3.06054   |
| H | 0.610291  | 0.049987  | 1.760553  |
| H | 0.953834  | -1.689821 | 1.655304  |
| N | -1.704818 | 1.317873  | -0.374555 |
| H | -0.68793  | 1.314937  | -0.317078 |
| H | -2.390145 | 2.588529  | -0.546325 |
| C | -2.946393 | 2.606206  | -1.487639 |
| H | -3.088311 | 2.763612  | 0.276997  |
| H | -1.641636 | 3.380708  | -0.556073 |

## (h) ts

|   |           |           |           |
|---|-----------|-----------|-----------|
| H | -5.601762 | -0.117427 | 1.104679  |
| H | -5.405889 | -0.881125 | -0.495614 |
| H | -5.352056 | 0.893555  | -0.326092 |
| C | -5.08346  | -0.057131 | 0.143694  |
| O | -3.05992  | 0.760826  | 1.149422  |
| C | -3.602188 | -0.067012 | 0.396523  |
| N | -2.873322 | -1.01285  | -0.224359 |
| H | -3.319272 | -1.656284 | -0.869152 |
| C | -1.440961 | -1.073088 | -0.032677 |
| H | -1.22003  | -1.212611 | 1.03015   |

|   |           |           |           |
|---|-----------|-----------|-----------|
| C | -0.841347 | -2.224073 | -0.840796 |
| C | -0.765413 | 0.213846  | -0.479519 |
| O | -1.206774 | 0.912586  | -1.36725  |
| H | 0.245183  | -2.247239 | -0.720602 |
| H | -1.249206 | -3.175634 | -0.489388 |
| H | -1.073295 | -2.10268  | -1.903909 |
| N | 0.473325  | 0.495955  | 0.182403  |
| C | 0.428668  | 1.806752  | 0.907381  |
| C | 1.620734  | 0.523026  | -0.759626 |
| H | 1.318673  | 0.183906  | -1.756996 |
| C | 2.107018  | 1.979262  | -0.772755 |
| C | 2.736104  | -0.420262 | -0.31129  |
| O | 3.784024  | -0.497576 | -0.981064 |
| H | 3.159601  | 2.063697  | -1.052046 |
| H | 1.504991  | 2.549178  | -1.488253 |
| C | 1.799607  | 2.430582  | 0.653526  |
| H | 2.542286  | 2.028217  | 1.351656  |
| H | 1.773155  | 3.517031  | 0.766645  |
| H | 0.213696  | 1.638959  | 1.965352  |
| H | -0.357574 | 2.442898  | 0.483021  |
| N | 2.536025  | -1.126218 | 0.800324  |
| H | 1.623491  | -1.034175 | 1.236219  |
| C | 3.512321  | -2.081079 | 1.29161   |
| H | 4.466374  | -1.585708 | 1.490901  |
| H | 3.136244  | -2.514846 | 2.217496  |
| H | 3.678054  | -2.879546 | 0.562061  |

### Ac-Ala- $\psi$ (CS-NH)Pro-NHMe

(a) FtAu

|   |           |           |           |
|---|-----------|-----------|-----------|
| H | -5.542907 | 0.069467  | -0.959206 |
| H | -4.999629 | -1.466296 | -0.220244 |
| H | -4.423654 | -0.987993 | -1.834232 |
| C | -4.702665 | -0.618449 | -0.841186 |
| O | -3.20762  | 1.253125  | -0.694822 |
| C | -3.525078 | 0.127473  | -0.279631 |
| N | -2.822463 | -0.485434 | 0.697576  |
| H | -2.991211 | -1.475605 | 0.84604   |
| C | -1.53971  | 0.041017  | 1.111136  |
| H | -1.698996 | 1.087966  | 1.371178  |
| C | -1.031819 | -0.714767 | 2.338327  |
| C | -0.483204 | -0.056741 | 0.002502  |
| S | -0.550835 | -1.275311 | -1.15351  |
| H | -0.071435 | -0.308238 | 2.669255  |
| H | -1.749179 | -0.617744 | 3.157775  |
| H | -0.897268 | -1.776481 | 2.104648  |
| N | 0.521651  | 0.815344  | 0.071395  |
| C | 0.64516   | 1.981018  | 0.97761   |
| C | 1.690348  | 0.723239  | -0.816178 |
| H | 1.35206   | 0.719604  | -1.855818 |
| C | 2.53491   | 1.974422  | -0.491077 |
| C | 2.51891   | -0.538101 | -0.606338 |
| O | 3.259019  | -0.937735 | -1.520561 |
| H | 3.341382  | 1.715291  | 0.202503  |
| H | 2.981813  | 2.387386  | -1.396603 |

|   |           |           |           |
|---|-----------|-----------|-----------|
| C | 1.545162  | 2.921986  | 0.186932  |
| H | 2.034388  | 3.653563  | 0.833328  |
| H | 0.949344  | 3.455693  | -0.560396 |
| H | 1.113829  | 1.66375   | 1.91716   |
| H | -0.329727 | 2.417241  | 1.189013  |
| N | 2.501808  | -1.102417 | 0.604622  |
| H | 1.824469  | -0.782433 | 1.28778   |
| C | 3.288092  | -2.289334 | 0.897056  |
| H | 3.005079  | -3.11648  | 0.238646  |
| H | 4.353685  | -2.083979 | 0.766707  |
| H | 3.102507  | -2.57588  | 1.931616  |

(b) FtFu

|   |           |           |           |
|---|-----------|-----------|-----------|
| H | -4.229555 | -1.805124 | -1.624588 |
| H | -5.430303 | -0.533203 | -1.341714 |
| H | -4.994142 | -1.662156 | -0.024969 |
| C | -4.617532 | -1.099542 | -0.881672 |
| O | -3.135082 | 0.75285   | -1.260046 |
| C | -3.505962 | -0.160752 | -0.505122 |
| N | -2.92197  | -0.359801 | 0.694428  |
| H | -3.122694 | -1.226477 | 1.182583  |
| C | -1.703201 | 0.339292  | 1.039229  |
| H | -1.910415 | 1.405931  | 0.945874  |
| C | -1.311952 | 0.027573  | 2.48329   |
| C | -0.532226 | -0.042484 | 0.124414  |
| S | -0.409144 | -1.596095 | -0.508561 |
| H | -0.400392 | 0.566559  | 2.75579   |
| H | -2.112852 | 0.335642  | 3.161171  |
| H | -1.132583 | -1.045826 | 2.606586  |
| N | 0.396007  | 0.890682  | -0.055679 |
| C | 0.310328  | 2.310535  | 0.359765  |
| C | 1.688259  | 0.60406   | -0.692122 |
| H | 1.522081  | 0.292503  | -1.728852 |
| C | 2.458115  | 1.935735  | -0.610305 |
| C | 2.452794  | -0.47448  | 0.067734  |
| O | 2.387188  | -0.565361 | 1.303027  |
| H | 3.064676  | 1.952837  | 0.301897  |
| H | 3.117685  | 2.062369  | -1.470655 |
| C | 1.354763  | 2.986297  | -0.519336 |
| H | 1.699907  | 3.929367  | -0.090757 |
| H | 0.930237  | 3.183809  | -1.509045 |
| H | 0.553241  | 2.397544  | 1.42543   |
| H | -0.691279 | 2.701815  | 0.183118  |
| N | 3.281652  | -1.217787 | -0.671286 |
| H | 3.225175  | -1.148314 | -1.68072  |
| C | 4.105481  | -2.257419 | -0.077707 |
| H | 4.795345  | -1.830392 | 0.654442  |
| H | 3.483681  | -3.009218 | 0.417904  |
| H | 4.678618  | -2.73462  | -0.871625 |

(c) FcBd

|   |           |          |           |
|---|-----------|----------|-----------|
| H | -4.318762 | 2.243054 | -0.611699 |
| H | -4.836598 | 0.760009 | 0.242483  |
| H | -4.332128 | 0.691787 | -1.464221 |

|          |           |           |           |        |           |           |           |
|----------|-----------|-----------|-----------|--------|-----------|-----------|-----------|
| C        | -4.145708 | 1.17037   | -0.496615 | C      | 3.106339  | -0.236587 | 1.176468  |
| O        | -1.7833   | 1.500938  | -0.748722 | C      | 1.585039  | 1.55315   | 0.237161  |
| C        | -2.706393 | 0.938487  | -0.13528  | O      | 1.86179   | 2.558767  | 0.910034  |
| N        | -2.46118  | 0.091358  | 0.881544  | H      | 3.726334  | 0.618006  | 1.454363  |
| H        | -3.234862 | -0.463861 | 1.2318    | H      | 3.113957  | -0.960226 | 1.997335  |
| C        | -1.11846  | -0.367797 | 1.176527  | C      | 3.518745  | -0.906808 | -0.1344   |
| H        | -0.521475 | 0.514508  | 1.424531  | H      | 3.779071  | -0.152271 | -0.883444 |
| C        | -1.166032 | -1.308242 | 2.379872  | H      | 4.371388  | -1.577873 | -0.01491  |
| C        | -0.487738 | -1.091289 | -0.024495 | H      | 2.115165  | -1.705728 | -1.640672 |
| S        | -1.425019 | -2.042491 | -1.041268 | H      | 2.242722  | -2.691895 | -0.17338  |
| H        | -0.170925 | -1.695416 | 2.613643  | N      | 1.2447    | 1.618765  | -1.052239 |
| H        | -1.545688 | -0.77179  | 3.253904  | H      | 1.035662  | 0.766082  | -1.558687 |
| H        | -1.824505 | -2.156432 | 2.165421  | C      | 1.155336  | 2.89287   | -1.749247 |
| N        | 0.829082  | -0.966915 | -0.17106  | H      | 2.112332  | 3.419281  | -1.707409 |
| C        | 1.570734  | -1.674041 | -1.237884 | H      | 0.897766  | 2.695008  | -2.78882  |
| C        | 1.760638  | -0.259687 | 0.729415  | H      | 0.3841    | 3.522873  | -1.297827 |
| H        | 1.432933  | -0.326724 | 1.769178  |        |           |           |           |
| C        | 3.07248   | -1.018073 | 0.501945  | (e) ts |           |           |           |
| C        | 1.934291  | 1.230406  | 0.407201  | H      | -5.402475 | 0.498399  | -1.372656 |
| O        | 2.85148   | 1.855377  | 0.964385  | H      | -5.185466 | 1.227691  | 0.244488  |
| H        | 3.937819  | -0.438323 | 0.825663  | H      | -5.199249 | -0.541566 | 0.046653  |
| H        | 3.038936  | -1.954061 | 1.068371  | C      | -4.892682 | 0.405129  | -0.410788 |
| C        | 3.03038   | -1.295493 | -0.999918 | O      | -2.90821  | -0.372929 | -1.517873 |
| H        | 3.288236  | -0.388994 | -1.558668 | C      | -3.408604 | 0.354136  | -0.64393  |
| H        | 3.708097  | -2.094214 | -1.307212 | N      | -2.638898 | 1.124267  | 0.149212  |
| H        | 1.184892  | -1.371669 | -2.214602 | H      | -3.072423 | 1.630837  | 0.913961  |
| H        | 1.398744  | -2.749252 | -1.120581 | C      | -1.194893 | 1.049847  | 0.089712  |
| N        | 1.091261  | 1.803377  | -0.454233 | H      | -0.87328  | 1.258278  | -0.936232 |
| H        | 0.238421  | 1.3179    | -0.726055 | C      | -0.596205 | 2.091138  | 1.039478  |
| C        | 1.124183  | 3.241632  | -0.673907 | C      | -0.644487 | -0.327639 | 0.445376  |
| H        | 0.935971  | 3.785569  | 0.257087  | S      | -1.333681 | -1.305656 | 1.549573  |
| H        | 2.098022  | 3.541981  | -1.067111 | H      | 0.496352  | 2.052108  | 1.030603  |
| H        | 0.353325  | 3.492885  | -1.401866 | H      | -0.905699 | 3.093572  | 0.730277  |
|          |           |           |           | H      | -0.942711 | 1.905677  | 2.061692  |
| (d) EcBd |           |           |           | N      | 0.560498  | -0.642072 | -0.250969 |
| H        | -4.660613 | 1.636564  | -1.164889 | C      | 0.501707  | -1.896671 | -1.04796  |
| H        | -5.378872 | 0.51234   | -0.002896 | C      | 1.792512  | -0.661178 | 0.575477  |
| H        | -4.533817 | -0.123428 | -1.437466 | H      | 1.55656   | -0.631364 | 1.64525   |
| C        | -4.534039 | 0.664224  | -0.681432 | C      | 2.511275  | -1.972733 | 0.198481  |
| O        | -3.06295  | 1.57234   | 0.983001  | C      | 2.685021  | 0.546013  | 0.303973  |
| C        | -3.268468 | 0.688413  | 0.132302  | O      | 3.657293  | 0.772708  | 1.049022  |
| N        | -2.381683 | -0.291938 | -0.108746 | H      | 3.598447  | -1.870856 | 0.243074  |
| H        | -2.610597 | -1.033653 | -0.764867 | H      | 2.206716  | -2.758699 | 0.896951  |
| C        | -1.159022 | -0.43684  | 0.660172  | C      | 1.966922  | -2.278929 | -1.19624  |
| H        | -0.797137 | 0.575788  | 0.852509  | H      | 2.452894  | -1.6528   | -1.952481 |
| C        | -1.419493 | -1.146163 | 1.995696  | H      | 2.088381  | -3.326941 | -1.480717 |
| C        | -0.124749 | -1.229362 | -0.136766 | H      | -0.007712 | -1.70899  | -1.997004 |
| S        | -0.597641 | -2.491468 | -1.141625 | H      | -0.041813 | -2.678131 | -0.500312 |
| H        | -0.500003 | -1.238735 | 2.581912  | N      | 2.390305  | 1.304651  | -0.752018 |
| H        | -2.14604  | -0.569138 | 2.574613  | H      | 1.525025  | 1.086112  | -1.237024 |
| H        | -1.822302 | -2.146679 | 1.811313  | C      | 3.110801  | 2.533157  | -1.032326 |
| N        | 1.151831  | -0.915844 | 0.064503  | H      | 4.17106   | 2.325829  | -1.198618 |
| C        | 2.262767  | -1.666556 | -0.558423 | H      | 2.692488  | 2.983783  | -1.931813 |
| C        | 1.652957  | 0.18004   | 0.911567  | H      | 3.017595  | 3.237793  | -0.199563 |
| H        | 1.086015  | 0.253138  | 1.841731  |        |           |           |           |

**Ac-Ala- $\psi$ (CSe-NH)Pro-NHMe**

(a) FtAu

|    |           |           |           |
|----|-----------|-----------|-----------|
| H  | -5.368636 | 0.279064  | -0.957665 |
| H  | -4.977427 | -1.0389   | 0.187074  |
| H  | -4.288506 | -1.036902 | -1.452223 |
| C  | -4.588975 | -0.402234 | -0.61066  |
| O  | -2.989501 | 1.381291  | -0.806519 |
| C  | -3.386836 | 0.387909  | -0.1788   |
| N  | -2.744431 | -0.046387 | 0.929068  |
| H  | -2.970978 | -0.977513 | 1.266026  |
| C  | -1.432547 | 0.47079   | 1.252107  |
| H  | -1.532247 | 1.550688  | 1.364208  |
| C  | -0.942598 | -0.129386 | 2.569932  |
| C  | -0.40309  | 0.156836  | 0.165786  |
| Se | -0.519808 | -1.398671 | -0.7784   |
| H  | 0.032958  | 0.288272  | 2.837092  |
| H  | -1.650757 | 0.104022  | 3.369539  |
| H  | -0.846814 | -1.216961 | 2.479002  |
| N  | 0.591588  | 1.011501  | 0.016744  |
| C  | 0.717175  | 2.351041  | 0.644755  |
| C  | 1.754142  | 0.733196  | -0.846965 |
| H  | 1.406023  | 0.567034  | -1.870328 |
| C  | 2.635319  | 1.991035  | -0.735244 |
| C  | 2.533587  | -0.506404 | -0.420395 |
| O  | 3.215685  | -1.113796 | -1.260747 |
| H  | 3.398369  | 1.849324  | 0.037382  |
| H  | 3.135818  | 2.199526  | -1.681964 |
| C  | 1.65379   | 3.080972  | -0.308776 |
| H  | 2.14468   | 3.927581  | 0.174829  |
| H  | 1.086656  | 3.446169  | -1.170977 |
| H  | 1.154476  | 2.237507  | 1.64359   |
| H  | -0.256361 | 2.831713  | 0.726356  |
| N  | 2.540322  | -0.824281 | 0.878751  |
| H  | 1.89657   | -0.351959 | 1.503725  |
| C  | 3.225865  | -2.013962 | 1.355712  |
| H  | 2.843375  | -2.908011 | 0.852436  |
| H  | 4.300412  | -1.938499 | 1.171852  |
| H  | 3.049042  | -2.101892 | 2.427131  |

(b) FtFu

|    |           |           |           |
|----|-----------|-----------|-----------|
| H  | -4.186878 | -1.503211 | -1.509002 |
| H  | -5.361655 | -0.203133 | -1.241421 |
| H  | -4.947643 | -1.32361  | 0.089674  |
| C  | -4.560486 | -0.780762 | -0.774915 |
| O  | -3.014482 | 1.011777  | -1.188738 |
| C  | -3.427541 | 0.136004  | -0.412431 |
| N  | -2.865776 | -0.041815 | 0.803961  |
| H  | -3.080397 | -0.89944  | 1.303103  |
| C  | -1.616643 | 0.615739  | 1.120036  |
| H  | -1.782153 | 1.688836  | 1.020398  |
| C  | -1.205701 | 0.305081  | 2.55934   |
| C  | -0.481917 | 0.181368  | 0.192198  |
| Se | -0.410034 | -1.542834 | -0.406152 |

|   |           |           |           |
|---|-----------|-----------|-----------|
| H | -0.281611 | 0.832579  | 2.812046  |
| H | -1.99177  | 0.633656  | 3.244957  |
| H | -1.043235 | -0.770691 | 2.686966  |
| N | 0.441188  | 1.077913  | -0.081151 |
| C | 0.383599  | 2.521006  | 0.260741  |
| C | 1.729262  | 0.739436  | -0.706424 |
| H | 1.555741  | 0.375156  | -1.724413 |
| C | 2.520412  | 2.060322  | -0.694053 |
| C | 2.466876  | -0.307319 | 0.126074  |
| O | 2.339275  | -0.356739 | 1.358937  |
| H | 3.131271  | 2.113687  | 0.213881  |
| H | 3.17846   | 2.128846  | -1.56191  |
| C | 1.435147  | 3.132296  | -0.655202 |
| H | 1.79745   | 4.088724  | -0.273646 |
| H | 1.010944  | 3.288206  | -1.65217  |
| H | 0.635875  | 2.650068  | 1.319628  |
| H | -0.61513  | 2.913667  | 0.070874  |
| N | 3.341866  | -1.064603 | -0.540387 |
| H | 3.34752   | -1.03138  | -1.553399 |
| C | 4.162154  | -2.04835  | 0.146925  |
| H | 4.733845  | -1.57007  | 0.945601  |
| H | 3.539959  | -2.837821 | 0.579899  |
| H | 4.850312  | -2.487419 | -0.574196 |

(c) FcBd

|    |           |           |           |
|----|-----------|-----------|-----------|
| H  | -3.631552 | 3.148642  | -0.66532  |
| H  | -4.34363  | 1.910985  | 0.411302  |
| H  | -3.945305 | 1.515937  | -1.278813 |
| C  | -3.633891 | 2.08921   | -0.398655 |
| O  | -1.262218 | 1.969973  | -0.74745  |
| C  | -2.238866 | 1.662945  | -0.04473  |
| N  | -2.095827 | 0.918955  | 1.071757  |
| H  | -2.936345 | 0.52685   | 1.485213  |
| C  | -0.844968 | 0.249293  | 1.364821  |
| H  | -0.078902 | 1.023663  | 1.462103  |
| C  | -0.980312 | -0.508985 | 2.685063  |
| C  | -0.443265 | -0.719993 | 0.248193  |
| Se | -1.725094 | -1.639898 | -0.662613 |
| H  | -0.060131 | -1.049609 | 2.922433  |
| H  | -1.189817 | 0.196616  | 3.493363  |
| H  | -1.799153 | -1.232947 | 2.61739   |
| N  | 0.844988  | -0.908689 | 0.039207  |
| C  | 1.366948  | -1.87571  | -0.956063 |
| C  | 1.958861  | -0.290243 | 0.789683  |
| H  | 1.695637  | -0.149019 | 1.840538  |
| C  | 3.082611  | -1.316736 | 0.617361  |
| C  | 2.38706   | 1.076268  | 0.240659  |
| O  | 3.428433  | 1.589135  | 0.679566  |
| H  | 4.060942  | -0.876197 | 0.813658  |
| H  | 2.917093  | -2.141257 | 1.317508  |
| C  | 2.884725  | -1.780878 | -0.825087 |
| H  | 3.287041  | -1.037014 | -1.521014 |
| H  | 3.362054  | -2.740118 | -1.033575 |
| H  | 0.985833  | -1.615579 | -1.946702 |
| H  | 0.99011   | -2.868858 | -0.690843 |

|   |          |          |           |    |           |           |           |
|---|----------|----------|-----------|----|-----------|-----------|-----------|
| N | 1.628152 | 1.660166 | -0.688619 | C  | 0.904446  | 1.342069  | -0.051457 |
| H | 0.69206  | 1.306357 | -0.871586 | H  | 0.487211  | 1.693852  | 0.897392  |
| C | 1.914844 | 3.014557 | -1.134236 | C  | 0.329173  | 2.171672  | -1.201939 |
| H | 1.85503  | 3.722342 | -0.301383 | C  | 0.482341  | -0.111095 | -0.205786 |
| H | 2.916413 | 3.06502  | -1.567216 | Se | 1.381297  | -1.252642 | -1.200876 |
| H | 1.182441 | 3.286459 | -1.893597 | H  | -0.754585 | 2.041672  | -1.272488 |

## (d) EcBd

|    |           |           |           |   |           |           |           |
|----|-----------|-----------|-----------|---|-----------|-----------|-----------|
| H  | -4.399754 | 2.285604  | -1.250417 | H | 0.780792  | 1.855126  | -2.148387 |
| H  | -5.190574 | 1.477354  | 0.110881  | N | -0.694084 | -0.455338 | 0.508986  |
| H  | -4.493474 | 0.50376   | -1.210374 | C | -0.510096 | -1.565274 | 1.479742  |
| C  | -4.366826 | 1.403368  | -0.605291 | C | -1.88797  | -0.753599 | -0.32111  |
| O  | -2.745106 | 2.380133  | 0.868126  | H | -1.609655 | -0.957998 | -1.361294 |
| C  | -3.070738 | 1.411932  | 0.158945  | C | -2.530736 | -1.9986   | 0.333448  |
| N  | -2.285814 | 0.328934  | 0.023253  | C | -2.867469 | 0.412191  | -0.365402 |
| H  | -2.623475 | -0.477735 | -0.496088 | O | -3.791287 | 0.406595  | -1.201513 |
| C  | -1.0669   | 0.163298  | 0.7953    | H | -3.622563 | -1.952461 | 0.312017  |
| H  | -0.580119 | 1.140799  | 0.815465  | H | -2.21331  | -2.891589 | -0.213297 |
| C  | -1.371867 | -0.287066 | 2.232249  | C | -1.936712 | -2.013186 | 1.743193  |
| C  | -0.155785 | -0.867462 | 0.143899  | H | -2.449622 | -1.296856 | 2.39397   |
| Se | -0.863007 | -2.349419 | -0.645114 | H | -1.976475 | -3.000974 | 2.208911  |
| H  | -0.452501 | -0.412354 | 2.812927  | H | 0.014449  | -1.196371 | 2.364968  |
| H  | -1.993835 | 0.468501  | 2.720067  | H | 0.071709  | -2.38131  | 1.031014  |
| H  | -1.911255 | -1.238749 | 2.212556  | N | -2.702392 | 1.389825  | 0.525437  |
| N  | 1.146148  | -0.695574 | 0.273219  | H | -1.868191 | 1.33839   | 1.101859  |
| C  | 2.145949  | -1.681197 | -0.198422 | C | -3.506899 | 2.598159  | 0.492868  |
| C  | 1.80398   | 0.449113  | 0.931241  | H | -4.558323 | 2.366346  | 0.68201   |
| H  | 1.256839  | 0.75724   | 1.823835  | H | -3.147064 | 3.27448   | 1.267649  |
| C  | 3.186029  | -0.110796 | 1.28833   | H | -3.423935 | 3.089695  | -0.481676 |
| C  | 1.920192  | 1.678368  | 0.026403  |   |           |           |           |
| O  | 2.396015  | 2.721342  | 0.500826  |   |           |           |           |
| H  | 3.91824   | 0.685824  | 1.431584  |   |           |           |           |
| H  | 3.099863  | -0.681236 | 2.218068  |   |           |           |           |
| C  | 3.495001  | -1.03732  | 0.112478  |   |           |           |           |
| H  | 3.849631  | -0.459209 | -0.746878 |   |           |           |           |
| H  | 4.248823  | -1.788967 | 0.353526  |   |           |           |           |
| H  | 1.985217  | -1.880218 | -1.260771 |   |           |           |           |
| H  | 1.986564  | -2.612691 | 0.355637  |   |           |           |           |
| N  | 1.512622  | 1.584422  | -1.241686 |   |           |           |           |
| H  | 1.148419  | 0.705355  | -1.591882 |   |           |           |           |
| C  | 1.610906  | 2.720197  | -2.145557 |   |           |           |           |
| H  | 2.656317  | 3.002406  | -2.297724 |   |           |           |           |
| H  | 1.171901  | 2.437199  | -3.101247 |   |           |           |           |
| H  | 1.067792  | 3.576488  | -1.73786  |   |           |           |           |

## (e) ts

|   |          |           |           |
|---|----------|-----------|-----------|
| H | 5.042959 | 0.967422  | 1.72041   |
| H | 4.898218 | 1.654937  | 0.075092  |
| H | 4.858603 | -0.105984 | 0.320638  |
| C | 4.563383 | 0.860506  | 0.745239  |
| O | 2.522664 | 0.247536  | 1.856661  |
| C | 3.071571 | 0.847616  | 0.919653  |
| N | 2.343954 | 1.50338   | -0.010761 |
| H | 2.814983 | 1.819152  | -0.852791 |
